# Supplementary material
Source: PubMed Central journal article supplement (PMC2117107)
Supplement: thorax_thx.2005.054908_1.pdf [file thorax_thx.2005.054908_1.pdf]

**THE CURRENT EVIDENCE ON DIAGNOSTIC ACCURACY OF COMMERCIAL BASED NUCLEIC ACID  
AMPLIFICATION TESTS FOR THE DIAGNOSIS OF PULMONARY TUBERCULOSIS.  
A META-REGRESSION ANALYSIS**

**APPENDIX – DETAILED STUDY SELECTION METHODOLOGY**

Stefania Greco, Enrico Girardi, Assunta Navarra, Cesare Saltini

## LITERATURE SEARCH

We used systematic methods to identify studies analysing diagnostic accuracy of commercial nucleic acid amplification tests (NAATs) for the diagnosis of pulmonary tuberculosis (TB).

An investigator (S.G.) developed a computerized search strategy to identify relevant studies published until 1 March 2005 in the Medline and Embase electronic databases.

This strategy employed key words (both controlled vocabulary and free text terms) and was divided into three parts, each connected by the [AND] bullion. The first part mapped the search for tuberculosis, the second, more complex part, mapped the search for nucleic acid amplification tests, while the final part limited the search to English-language studies. A detailed description of our search strategy is shown in fig S1. We first searched for articles in the Medline database. All duplicate articles found in the Embase database were excluded.

We updated the literature search in Medline through 1 July 2005 by employing the same search strategy. Subsequently, the references listed in articles previously retrieved were scrutinized.

### FIGURE S1

MEDLINE search strategy for studies on diagnostic capability of commercial NAAT for pulmonary tuberculosis

```
mycobacterium tuberculosis[MeSH Terms] OR (mycobacterium[Text Word] AND tuberculosis[Text Word])  
OR tuberculosis[MeSH Terms] OR tuberculosis[Text Word]  
AND  
((((((molecular[Text Word] AND (“diagnostic techniques and procedures”[MeSH Terms]) OR  
(diagnostic[Text Word] AND (techniques[Text Word] OR tests[Text Word] OR methods[Text Word]))) OR  
direct[Text Word] AND (detection[Text Word] OR amplification[Text Word] OR identification[Text Word])  
AND (test[Text Word] OR assay[Text Word] OR system[Text Word] OR method[Text Word] OR  
technique[Text Word]) OR nucleic acid amplification techniques[MeSH Terms] OR ((nucleic[Text Word]  
AND acid[Text Word] AND amplification[Text Word]) OR (molecular[Text Word]) AND (test[Text Word] OR  
assay[Text Word] OR system[Text Word] OR method[Text Word] OR technique[Text Word]) OR  
amplification[Text Word] AND (gene[Text Word] OR genes[Text Word] OR genetic[Text Word] OR  
DNA[Text Word] OR deoxyribonucleic[Text Word] OR RNA[Text Word] OR ribonucleic[Text Word]) OR  
PCR[Text Word] OR polymerase chain reaction[MeSH Terms] OR (polymerase[Text Word] AND  
chain[Text Word] AND reaction[Text Word]) OR LCX[Text Word] OR LCR[Text Word] OR (ligase[Text  
Word] AND chain[Text Word] AND reaction[Text Word]) OR SDA[Text Word] OR (strand[Text Word] AND  
displacement[Text Word] AND amplification[Text Word] OR BDProbeTec[Text Word] OR MTD[Text Word]  
OR (mycobacterium [Text Word] AND direct[Text Word] AND test[Text Word]) OR (Amplicor[Text Word])  
OR (Cobas[Text Word] AND Amplicor[Text Word])))
```

AND English[Lang]

## STUDY SELECTION PROCESS

To be included, a study had to 1) examine commercial NAAT diagnostic performance on respiratory samples (a percentage of <5% of non respiratory samples was tolerated); 2) apply Mycobacterium tuberculosis (MTB) culture performed on the same sample as reference standard for pulmonary TB diagnosis; 3) provide sufficient original data to permit calculation of sensitivity and/or specificity; and 4) be written in English. We excluded studies 1) reporting sensitivity and specificity “revised” by means of discrepant analysis; 2) analysing sample population used in different studies published by the same research group (only the article reporting on the largest number of samples was considered) and 3) including a percentage of gastric aspirates of >5%.

The selection of the studies to be included in the meta-analysis was based upon the above mentioned criteria. As assessing study relevance and extracting data require the use of judgement, two independent investigators reviewed the articles and disagreements were settled by consensus. The initial search strategy (fig S1) yielded a total of 3,302 citations and a further 41 were identified by checking the references of retrieved articles. A careful review of titles and abstracts eliminated 2,864 citations, that were clearly outside the scope of the meta-analysis. The relevance of the remaining 479 was judged by applying inclusion and exclusion criteria. After eliminating 73 reviews (or comments)<sup>1-73</sup> and 66 articles exploring technical issues related to the use of NAAT both for direct application on clinical specimens and for identification of Mycobacterium tuberculosis in culture<sup>74-139</sup>, we evaluated 340 studies reporting primary data on clinical utility of NAAT for TB.

Of the articles which did not analyse commercial NAAT, 171 used different types of home-grown PCR<sup>140-310</sup> and 25 evaluated two commercial NAAT which were withdrawn from the market more than seven years ago, i.e. the old version of Gen Probe MTD and the Q-beta replicase<sup>311-335</sup>. Although the Abbott Ligase Chain Reaction (LCx) test has been withdrawn from the market in 2002, we elected to include articles on LCx performance as this test is still used in many hospital laboratories.

The inclusion of a percentage above 5% of non respiratory samples lead to the exclusion of further 15 articles<sup>336-350</sup>. Although gastric aspirate examination is used for pulmonary TB diagnosis, the lower yield of both culture and NAAT on this type of sample could markedly and variably alter accuracy estimates<sup>343</sup>. Thus, we excluded 7 articles that evaluated a percentage of gastric aspirates higher than 5%<sup>351-357</sup>.

With the exception of 3 articles on commercial NAAT utility for pulmonary TB follow-up<sup>358-360</sup> and 8 articles not fulfilling inclusion criteria for different reasons<sup>361-368</sup>, the remaining 114 articles estimated sensitivity and specificity of commercial NAAT for pulmonary TB diagnosis. Among them, 39 did not provide data sufficient for computation of accuracy for AFB+ and/or

AFB- samples<sup>369-407</sup>, 3 were from authors publishing several reports on the same samples<sup>408-410</sup> and in 6 articles accuracy was analysed on a “per patient” basis, without taking into consideration the different number of specimens collected for each patient (from 2 to 6)<sup>411-416</sup>. The remaining 63 articles were finally included in the meta-analysis<sup>417-479</sup>. The reasons for exclusion are also outlined in Fig. S2.

Since 8 out of the 63 included articles analyzed 2 different commercial NAATs, 71 studies on the whole were available (56 on AFB+ and 60 on AFB- samples). The commercial NAATs evaluated were: Roche Amplicor MTB (25 studies), its entirely automated version, Cobas Amplicor MTB (10), E-MTD (14), BDProbeTecET (12), LCx (10). Overall, the 63 articles examined 51,160 samples: 5,729 MTB culture positive and 45,431 MTB culture negative. The median number of samples per study was 410 (IQR 247 to 662), with a median pulmonary TB prevalence of 0,14 (IQR 0,07-0,3).

A summary of the 63 included articles reporting the 2x2 table of true positives and negatives and false positives and negatives and the related diagnostic odds ratios is shown in Table S1.

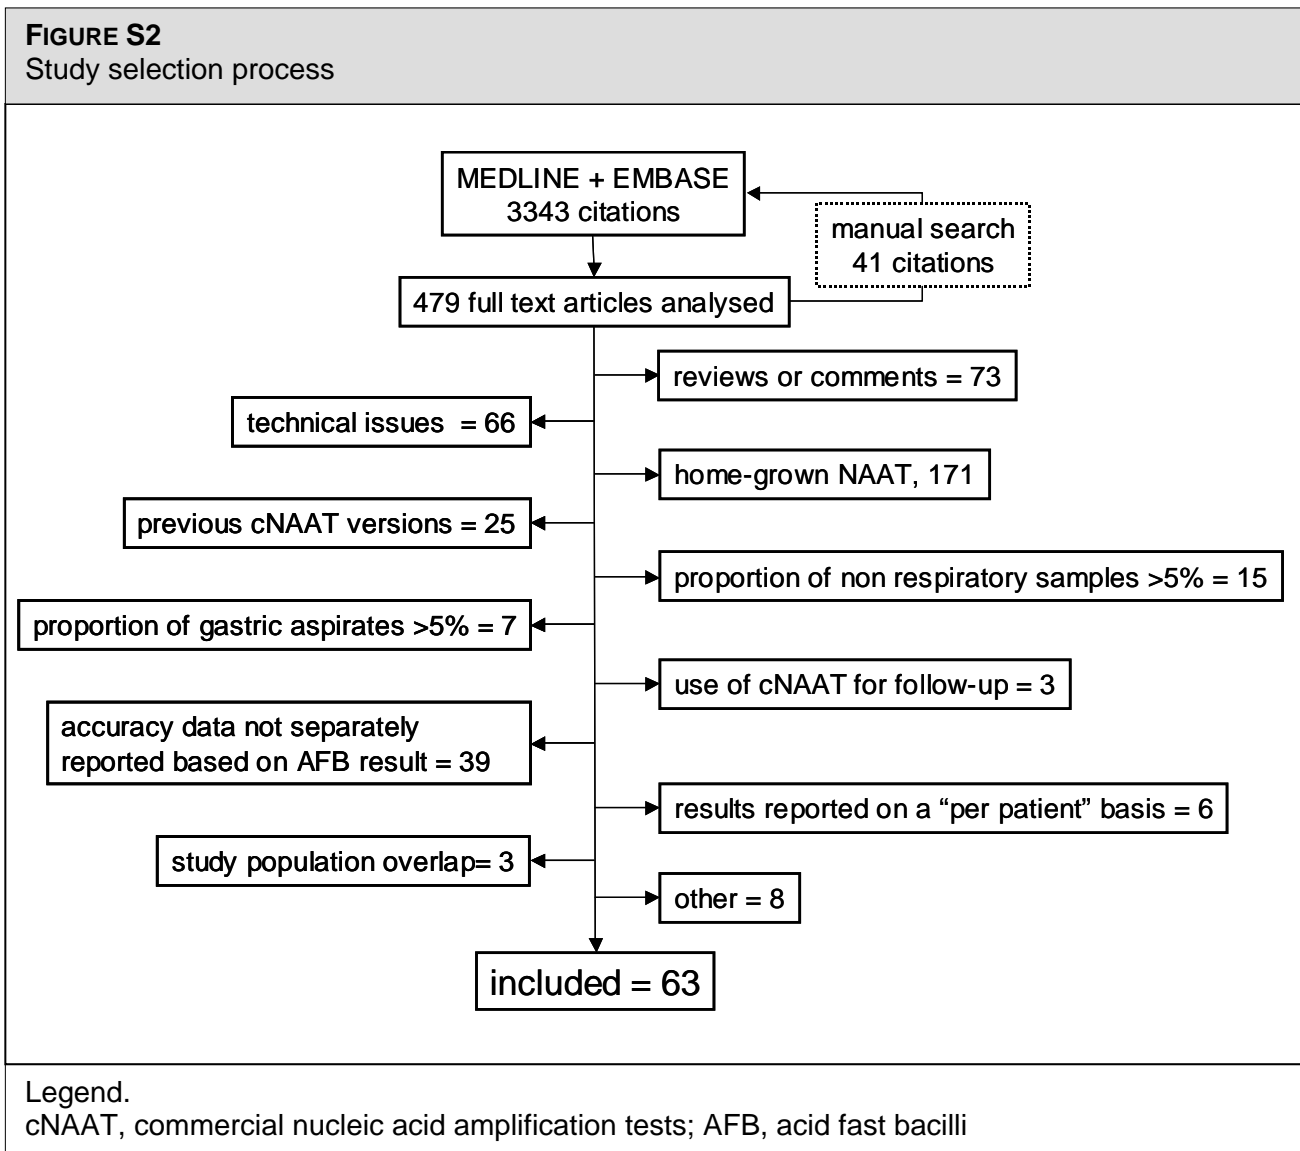

**Table S1.** Results of the 63 included studies

| study                  | NAAT           | AFB+ samples |       |      |      |       |            | AFB- samples |          |      |      |       |            |
|------------------------|----------------|--------------|-------|------|------|-------|------------|--------------|----------|------|------|-------|------------|
|                        |                | a/c          | b/d   | TPR  | TNR  | DOR   | prevalence | a/c          | b/d      | TPR  | TNR  | DOR   | prevalence |
| Beavis 1995 [420]      | Amplicor       | 80/1         | 10/8  | 0,99 | 0,44 | 64    | 0,82       | 3/3          | 7/420    | 0,50 | 0,98 | 60    | 0,01       |
| D'Amato 1995 [432]     | Amplicor       | 13/1         | 5/17  | 0,93 | 0,74 | 44    | 0,39       | 21/20        | 9/899    | 0,51 | 0,99 | 105   | 0,04       |
| Moore 1995 [457]       | Amplicor       | 82/1         | 6/2   | 0,99 | 0,25 | 27    | 0,91       | 52/27        | 8/798    | 0,66 | 0,97 | 75    | 0,09       |
| Vuorinen 1995 [473]    | Amplicor       | 20/0         | 0/3   | 1    | 1    | 240   | 0,87       | 2/4          | 2/218    | 0,33 | 0,99 | 55    | 0,03       |
| Zolnir-Dove 1995 [479] | Amplicor       | 40/0         | 3/0   | 1    | 0,14 | 13    | 0,93       | 8/2          | 9/219    | 0,80 | 0,99 | 97    | 0,04       |
| Bennedsen 1996 [421]   | Amplicor       | 413/39       | 0/36  | 0,91 | 1    | 762   | 0,93       | 123/79       | 254/6250 | 0,61 | 0,96 | 38    | 0,03       |
| Bergmann 1996 [423]    | Amplicor       | 40/1         | 1/10  | 0,98 | 0,91 | 400   | 0,79       | 8/12         | 5/879    | 0,40 | 0,99 | 117   | 0,02       |
| Cartuyvels 1996 [427]  | Amplicor       | 11/1         | 1/0   | 0,92 | 0,50 | 6     | 0,92       | 6/7          | 16/614   | 0,46 | 0,98 | 33    | 0,02       |
| Dalovisio 1996 [431]   | Amplicor       | 25/3         | 3/34  | 0,89 | 0,92 | 94    | 0,43       | 16/12        | 12/283   | 0,57 | 0,96 | 31    | 0,09       |
| Dilworth 1996 [435]    | Amplicor       | 11/1         | 0/1   | 0,92 | 1    | 22    | 0,92       | -            | -        | -    | -    | -     | -          |
| Ichiyama 1996 [440]    | Amplicor       | 74/0         | 5/10  | 1    | 0,67 | 296   | 0,83       | 45/2         | 26/257   | 0,94 | 0,87 | 222   | 0,14       |
| Soini 1996 [469]       | Amplicor       | 12/1         | 8/4   | 0,92 | 0,33 | 6     | 0,52       | 1/1          | 4/45     | 0,50 | 0,92 | 11    | 0,04       |
| Tevere 1996 [470]      | Amplicor       | 59/0         | 1/17  | 1    | 0,94 | 2006  | 0,77       | 16/7         | 4/558    | 0,70 | 0,99 | 319   | 0,04       |
| Lebrun 1997 [448]      | Amplicor       | 42/1         | 0/12  | 0,98 | 1    | 1008  | 0,78       | 9/17         | 0/14     | 0,34 | 1    | 14,82 | 0,64       |
| Liu 1997 [451]         | Amplicor       | 41/0         | 0/42  | 1    | 1    | 6888  | 0,49       | 2/0          | 0/1      | 1    | 1    | 8     | 0,57       |
| Piersimoni 1997 [460]  | Amplicor       | -            | -     | -    | -    | -     | -          | 6/1          | 2/272    | 0,86 | 0,99 | 816   | 0,02       |
| Smith MB 1997 [467]    | Amplicor       | 23/1         | 8/14  | 0,96 | 0,64 | 40    | 0,52       | 8/4          | 3/498    | 0,67 | 0,97 | 810   | 0,02       |
| Yuen 1997 [478]*       | Amplicor       | 48/3         | 2/3   | 0,94 | 0,60 | 24    | 0,91       | 11/8         | 4/130    | 0,58 | 0,97 | 45    | 0,12       |
| Kearns 1998 [446]      | Amplicor       | 37/1         | 2/7   | 0,97 | 0,78 | 130   | 0,81       | 8/13         | 0/24     | 0,44 | 1    | 30    | 0,46       |
| Gamboa 1998 [438]*     | Amplicor       | 176/0        | 28/27 | 1    | 0,49 | 339   | 0,76       | 24/23        | 0/477    | 0,51 | 1    | 995   | 0,09       |
| Miller 2002 [456]      | Amplicor       | 103/2        | 0/30  | 0,98 | 1    | 3090  | 0,78       | -            | -        | -    | -    | -     | -          |
| Yee 2002 [477]         | Amplicor       | -            | -     | -    | -    | -     | -          | 3/2          | 1/66     | 0,60 | 0,99 | 99    | 0,07       |
| Cleary 2003 [429]      | Amplicor       | 190/8        | 0/168 | 0,96 | 1    | 7980  | 0,54       | -            | -        | -    | -    | -     | -          |
| Iinuma 2003 [441]*     | Amplicor       | -            | -     | -    | -    | -     | -          | 6/4          | 0/304    | 0,60 | 1    | 912   | 0,03       |
| Iwamoto 2003 [442]     | Amplicor       | 12/0         | 2/13  | 1    | 0,87 | 156   | 0,44       | 8/0          | 1/30     | 1    | 0,97 | 480   | 0,21       |
| Gamboa 1998 [438]*     | Cobas Amplicor | 176/0        | 28/27 | 1    | 0,49 | 339   | 0,76       | 28/19        | 0/477    | 0,60 | 1    | 1406  | 0,09       |
| Jan 1998 [443]         | Cobas Amplicor | 19/2         | 0/7   | 0,91 | 1    | 133   | 0,75       | 15/4         | 4/537    | 0,79 | 0,99 | 503   | 0,03       |
| Reischl 1998 [463]     | Cobas Amplicor | 42/2         | 1/10  | 0,95 | 0,91 | 210   | 0,80       | 6/7          | 4/571    | 0,46 | 0,99 | 122   | 0,02       |
| Yam 1998 [476]         | Cobas Amplicor | 18/1         | 0/7   | 0,95 | 1    | 252   | 0,73       | 20/5         | 0/334    | 0,80 | 1    | 2672  | 0,07       |
| Wang 1999 [475]*       | Cobas Amplicor | -            | -     | -    | -    | -     | -          | 5/1          | 6/152    | 0,83 | 0,96 | 127   | 0,04       |
| Scarpato 2000 [466]*   | Cobas Amplicor | 95/2         | 0/11  | 0,98 | 1    | 1045  | 0,90       | 13/4         | 5/166    | 0,76 | 0,96 | 108   | 0,09       |
| Bogard 2001 [426]      | Cobas Amplicor | 183/16       | 8/42  | 0,92 | 0,84 | 60    | 0,80       | 95/36        | 47/4650  | 0,73 | 0,99 | 261   | 0,03       |
| Jonsson 2003 [445]     | Cobas Amplicor | 46/1         | 0/17  | 0,98 | 1    | 1564  | 0,73       | 42/19        | 6/746    | 0,69 | 0,99 | 275   | 0,08       |
| Levidiotou 2003 [450]  | Cobas Amplicor | 189/6        | 15/40 | 0,97 | 0,73 | 84    | 0,78       | 21/38        | 30/7215  | 0,36 | 1    | 133   | 0,01       |
| Kim 2004 [447]*        | Cobas Amplicor | -            | -     | -    | -    | -     | -          | 6/7          | 0/126    | 0,46 | 1    | 216   | 0,09       |
| Bergmann 2000 [422]    | BDProbeTecET   | 12/0         | 0/11  | 1    | 1    | 91    | 0,52       | 2/2          | 6/567    | 0,50 | 0,99 | 95    | 0,01       |
| Barrett 2002 [419]     | BDProbeTecET   | 99/2         | 2/64  | 0,98 | 0,97 | 1584  | 0,60       | 1/7          | 1/29     | 0,13 | 0,97 | 4     | 0,21       |
| Johansen 2002 [444]    | BDProbeTecET   | 85/0         | 0/11  | 1    | 1    | 3740  | 0,89       | 39/26        | 3/186    | 0,60 | 0,98 | 93    | 0,26       |
| Maugein 2002 [453]     | BDProbeTecET   | 43/0         | 0/6   | 1    | 1    | 1032  | 0,88       | 18/8         | 8/464    | 0,69 | 0,98 | 131   | 0,05       |
| Piersimoni 2002 [462]* | BDProbeTecET   | 75/1         | 0/31  | 0,99 | 1    | 4650  | 0,71       | 11/4         | 2/207    | 0,73 | 1    | 285   | 0,07       |
| De la Calle 2003 [433] | BDProbeTecET   | 21/0         | 0/1   | 1    | 1    | 84    | 0,95       | 9/2          | 2/442    | 0,82 | 0,99 | 995   | 0,02       |
| Iinuma 2003 [441]*     | BDProbeTecET   | -            | -     | -    | -    | -     | -          | 5/5          | 1/303    | 0,50 | 1    | 303   | 0,03       |
| Mazzarelli 2003 [454]  | BDProbeTecET   | 133/2        | 1/27  | 0,99 | 0,96 | 1796  | 0,83       | 35/14        | 6/343    | 0,71 | 0,98 | 143   | 0,12       |
| McHugh 2004 [455]      | BDProbeTecET   | 48/0         | 2/0   | 1    | 0,20 | 24    | 0,96       | 33/2         | 28/245   | 0,94 | 0,90 | 149   | 0,11       |
| Kim 2004 [447]*        | BDProbeTecET   | -            | -     | -    | -    | -     | -          | 7/6          | 7/119    | 0,54 | 0,94 | 18    | 0,10       |
| Rusch-Gerd. 2004 [465] | BDProbeTecET   | 36/0         | 0/2   | 1    | 1    | 288   | 0,95       | 54/8         | 36/612   | 0,87 | 0,94 | 106   | 0,09       |
| Wang 2004 [474]        | BDProbeTecET   | 11/1         | 8/1   | 0,92 | 0,11 | 1,4   | 0,57       | 11/7         | 27/486   | 0,61 | 0,95 | 29    | 0,04       |
| Bodmer 1996 [425]      | E-MTD          | 14/0         | 0/19  | 1    | 1    | 1064  | 0,42       | 6/4          | 5/669    | 0,60 | 0,99 | 201   | 0,01       |
| Gamboa 1998 [437]      | E-MTD          | 48/0         | 0/19  | 1    | 1    | 3648  | 0,72       | 42/5         | 0/296    | 0,89 | 1    | 4973  | 0,14       |
| Piersimoni 1998 [461]* | E-MTD          | 36/0         | 0/6   | 1    | 1    | 864   | 0,86       | 24/1         | 6/175    | 0,96 | 0,97 | 700   | 0,12       |
| Bergmann 1999 [424]    | E-MTD          | 13/0         | 2/7   | 1    | 0,78 | 528   | 0,59       | 15/8         | 10/949   | 0,65 | 0,99 | 178   | 0,02       |
| Chedore 1999 [428]     | E-MTD          | 189/0        | 7/286 | 1    | 0,98 | 15444 | 0,39       | 5/0          | 2/127    | 1    | 0,98 | 635   | 0,04       |
| Smith MB 1999 [468]    | E-MTD          | 14/1         | 0/7   | 0,93 | 1    | 196   | 0,68       | 5/0          | 13/243   | 1    | 0,99 | 77    | 0,02       |
| Gallina 2000 [436]     | E-MTD          | 75/6         | 5/15  | 0,93 | 0,75 | 37    | 0,80       | 27/9         | 68/155   | 0,75 | 0,70 | 7     | 0,14       |
| Scarpato 2000 [466]*   | E-MTD          | 89/8         | 0/11  | 0,92 | 1    | 245   | 0,90       | 13/4         | 6/165    | 0,76 | 0,96 | 89    | 0,09       |
| Alcala 2001 [417]      | E-MTD          | 77/2         | 1/2   | 0,98 | 0,67 | 77    | 0,96       | 28/8         | 39/506   | 0,78 | 0,93 | 45    | 0,06       |
| Gurkan 2002 [439]      | E-MTD          | -            | -     | -    | -    | -     | -          | 10/6         | 72/297   | 0,63 | 0,80 | 7     | 0,04       |
| O'Sullivan 2002 [459]  | E-MTD          | 30/0         | 1/61  | 1    | 0,98 | 3660  | 0,33       | 3/1          | 2/238    | 0,75 | 0,99 | 357   | 0,02       |
| Piersimoni 2002 [462]* | E-MTD          | 71/5         | 2/29  | 0,93 | 0,94 | 206   | 0,71       | 10/5         | 0/209    | 0,67 | 1    | 836   | 0,07       |
| Coll 2003 [430]        | E-MTD          | 184/1        | 1/47  | 1    | 0,98 | 8648  | 0,79       | 52/23        | 3/2993   | 0,69 | 1    | 2256  | 0,02       |
| Lemaitre 2004 [449]    | E-MTD          | -            | -     | -    | -    | -     | -          | 3/5          | 1/20     | 0,38 | 0,95 | 12    | 0,28       |
| Ausina 1997 [418]      | LCx            | 139/2        | 20/26 | 0,99 | 0,57 | 90    | 0,75       | 15/16        | 3/299    | 0,48 | 0,99 | 93    | 0,09       |
| Yuen 1997 [478]*       | LCx            | 47/4         | 4/1   | 0,92 | 0,20 | 3     | 0,91       | 7/12         | 7/127    | 0,37 | 0,95 | 11    | 0,12       |
| Denis 1998 [434]       | LCx            | 7/0          | 0/1   | 1    | 1    | 28    | 0,88       | 2/0          | 4/196    | 1    | 0,98 | 196   | 0,01       |
| Moore 1998 [458]       | LCx            | 13/0         | 8/0   | 1    | 0,06 | 2     | 0,62       | 12/9         | 21/451   | 0,57 | 0,98 | 73    | 0,04       |
| Piersimoni 1998 [461]* | LCx            | 33/3         | 0/6   | 0,92 | 1    | 132   | 0,86       | 16/9         | 6/175    | 0,64 | 0,97 | 56    | 0,12       |
| Lumb 1999 [452]        | LCx            | 65/1         | 10/63 | 0,99 | 0,86 | 410   | 0,47       | 27/26        | 12/1879  | 0,51 | 0,99 | 163   | 0,03       |
| Rohner 1999 [464]      | LCx            | 55/3         | 1/9   | 0,95 | 0,90 | 165   | 0,85       | 14/6         | 44/1869  | 0,70 | 0,98 | 99    | 0,01       |
| Viveiros 1999 [472]    | LCx            | 20/0         | 3/5   | 1    | 0,63 | 67    | 0,71       | 8/1          | 3/53     | 0,89 | 0,95 | 141   | 0,14       |
| Wang 1999 [475]*       | LCx            | -            | -     | -    | -    | -     | -          | 6/0          | 7/151    | 1    | 0,96 | 258   | 0,03       |
| Viinanen 2000 [471]    | LCx            | 23/1         | 0/9   | 0,96 | 1    | 414   | 0,73       | 3/4          | 5/202    | 0,43 | 0,98 | 30    | 0,03       |

**Legend to Table 1S**

\*, articles analysing two different commercial NAATs; a, true positives; c, false negatives; b, false positives; d, true negatives; TPR, true positive rate (sensitivity); TNR, true negative rate (specificity); DOR, diagnostic odds ratio. Prevalence was calculated as the proportion of Mycobacterium tuberculosis culture positive samples among AFB+ or AFB- sample population. In parentheses, reference number.

## EVALUATION OF THE PUBLICATION BIAS

Publication bias is the tendency on the part of investigators to publish (and of reviewers to accept for publication) manuscripts with more optimistic results. As meta-analysis collects the body of published studies on a specified topic, it may reinforce the impact of the selection of positive papers and report inflated pooled estimates of diagnostic accuracy<sup>480</sup>.

We used a funnel plot to evaluate primary studies for publication bias. In a funnel plot the diagnostic odds ratio (DOR) is plotted against a measure of its precision, such as standard error (that is inversely proportional to sample size). As random variation of DOR estimates are expected to be smaller among larger studies, while results from small studies be widely scattered, meta-analysis data should be symmetrically distributed in a funnel shaped area. If publication bias is present, i.e., a tendency of small studies to report positive results (or, better, small studies with negative results are lacking) is present an asymmetrical funnel plot will be obtained. The Begg and Mazumdar adjusted rank correlation test (between DOR and its variances)<sup>481</sup> and the Egger regression asymmetry test<sup>482</sup>, are used for the statistical analysis of the visual funnel graph.

In our case, although the Begg's test was not significant (AFB+ samples,  $p=0,202$ ; AFB- samples,  $p=0,170$ ), the visual inspection of both funnel plots revealed the presence of some asymmetry (figure S3) and the Egger's test indicated a significant correlation between  $\ln$ DOR and its standard error both for studies on AFB+ samples (regression coefficient 1,14,  $p=0.011$ ) and for studies on AFB- samples (regression coefficient 0,97  $p=0.022$ ).

**FIGURE S3**

Funnel plot with pseudo 95% confidence limits.

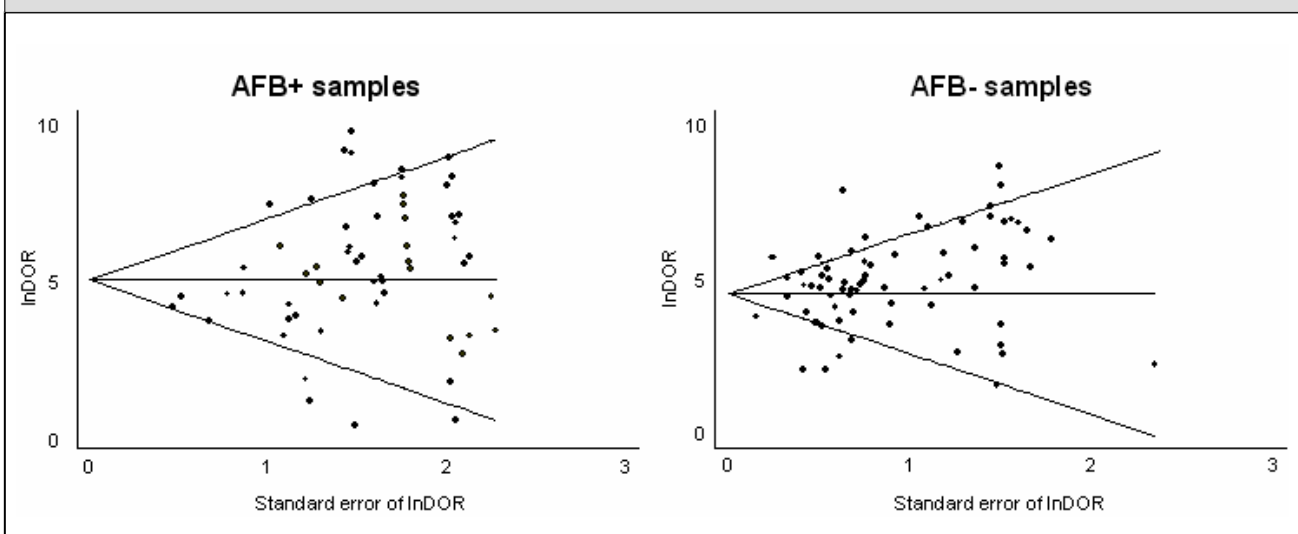

Legend.

$\ln$ DOR, logarithm of Diagnostic Odds Ratio. Each closed circle represents each study in the meta-analysis, while the line in the center represents the summary value of  $\ln$ DOR

## REFERENCES

1. [No authors listed]. Rapid diagnostic tests for tuberculosis: what is the appropriate use? American Thoracic Society Workshop. *Am J Respir Care Med* 1997; 155 : 1804-14
2. Afghani B, Stutman HR. Diagnosis of tuberculosis: can the polymerase chain reaction replace acid-fast bacilli smear and culture? *J Infect Dis* 1995; 172(3): 903-5
3. Anonymous. PCR and the mis-diagnosis of active tuberculosis. *New Engl J Med* 1995; 332(15): 1043
4. Arias-Bouda LP, Kolk AH. PCR-based assays for the diagnosis of tuberculosis. *Int J Tuberc Lung Dis* 2001; 5(12):1163-64
5. Barnes PF, Bloch AB, Davidson PT, Snider DE. Tuberculosis in patients with human immunodeficiency virus infection. *N Engl J Med* 1991; 324: 1644-1650
6. Barnes PF. Rapid diagnostic tests for tuberculosis: progress but no gold standard. *Am J Respir Crit Care Med* 1997;155(5):1497-8
7. Baxter R. Large-scale use of PCR for detection of *Mycobacterium tuberculosis* in a routine mycobacteriology laboratory. *J Clin Microbiol* 1994; 32(1): 273-74
8. Burkardt HJ. Standardization and quality control of PCR analyses. *Clin Chem Lab Med.* 2000;38(2):87-91
9. Butt T, Ahmad RN, Kazmi SY, Afzal RK, Mahmood A. An update on the diagnosis of tuberculosis. *J Coll Physicians Surg Pak* 2003; 13(12): 728-34
10. Catanzaro A. Assessing the indications for rapid diagnostic tests for tuberculosis. *J Respir Dis* 2001; 22(4): 202-205
11. Catanzaro A. Value of direct amplified test for diagnosis of tuberculosis. *Lancet* 1996; 347: 1500-1501
12. Clarridge III JE. Large-scale use of PCR for detection of *mycobacterium tuberculosis* in a routine mycobacteriology laboratory. *J Clin Microbiol* 1994; 32(3): 860
13. Collazos J. Molecular biology applied to tuberculosis: The third landmark. *Chest* 1996; 110(6): 1381-82
14. Daniel TM. The rapid diagnosis of tuberculosis: a selective review. *J Lab Clin Med* 1990; 116(3): 277-82
15. Dawson D. Comparison of nucleic acid amplification test for tuberculosis. *J Clin Microbiol* 1999; 37(4): 1226
16. Doern GV. Diagnostic mycobacteriology: where are we today? *J Clin Microbiol* 1996; 34(8): 1873-6
17. Drobniwski FA, Caws M, Gibson A, Young D. Modern laboratory diagnosis of tuberculosis. *Lancet Infect Dis* 2003; 3: 141-7
18. Forbes BA. Critical assessment of gene amplification approaches on the diagnosis of tuberculosis. *Immunol Invest* 1997; 26(1-2): 105-16
19. Forbes BA. Introducing a molecular test into the clinical microbiology laboratory. *Arch Pathol Lab Med* 2003; 127: 1106-11
20. Freeman R, Magee JG, Watt B, Rayner AB. Being positive about the smear. *Thorax* 2001; 56(5): 417
21. From the Centers for Disease Control and Prevention. Update: Nucleic acid amplification tests for tuberculosis. *JAMA* 2000; 16; 284(7): 826
22. Frothingham R. Applications of the polymerase chain reaction to infectious disease diagnosis. *Ann Saudi Med* 1996; 16(6): 657-665
23. Garcia JE, Losada JP, Gonzalez Villaron L. Reliability of the polymerase chain reaction in the diagnosis of mycobacterial infection. *Chest* 1996; 110(1): 300-1
24. Garg SK, Tiwari RP, Singh R, Malhotra D, Ramnani VK, Prasad GBKS, Chandra R, Fraziano M, Colizzi V, Bisen PS. Diagnosis of tuberculosis : available technologies, limitations and possibilities. *J Clin Lab Anal* 2003; 17: 155-63
25. Gillespie SH, McHugh TD. Monitoring the therapy of pulmonary tuberculosis by nested polymerase chain reaction. *J Infect* 1997; 35(3): 324-25
26. Godfrey-Fausset P. Molecular diagnosis tuberculosis: the need for new diagnostic tools. *Thorax* 1995; 50: 709-11
27. Grosser M, Dittert DD, Luther T. Molecular detection of *M. tuberculosis* DNA in tuberculosis and sarcoidosis. *Diagn Mol Pathol* 2001; 10(1): 66-68
28. Grosset J Mouton Y. Is PCR a useful tool for the diagnosis of tuberculosis in 1995? *Tuberc Lung Dis* 1995 76 183 184



29. Hawkey PM. The role of polymerase chain reaction in the diagnosis of mycobacterial infections. *Rev Med Microbiol* 1994; 5(1): 21-32
30. Heifets L. Dilemmas and realities of rapid diagnostic tests for tuberculosis. *Chest* 2000;118(1):4-5
31. Hill CS. Molecular diagnostics for infectious diseases. *Journal of Clinical Ligand Assay* 1996; 19(1): 43-52
32. Ho TB, Shaw RJ. Diagnosis and management of tuberculosis. *Monaldi Arch Chest Dis* 1998; 53(4): 424-28
33. Hoorfar J, Wolffs P, Radstrom P. Diagnostic PCR: validation and sample preparation are two sides of the same coin. *APMIS* 2004; 112: 808-14
34. Huggett JF, McHugh TD, Zumla A. Tuberculosis: amplification-based clinical diagnostic techniques. *Int J Biochem Cell Biol* 2003; 35: 1407-12
35. Ieven M, Goossens H. Relevance of nucleic acid amplification techniques for diagnosis of respiratory tract infections in the clinical laboratory. *Clin Microbiol Rev* 1997; 10(2): 242-56
36. Ieven, Goossens H. Relevance of nucleic acid amplification techniques for diagnosis of respiratory tract infections in the clinical laboratory. *Clin Microbiol Rev* 1997; 10 (2): 242-256
37. Jolobe OM. PCR to detect M tuberculosis. *J Clin Pathol* 1999; 52(5): 399
38. Jonas V, Longiaru M. Detection of M.tuberculosis by molecular methods. *Clin Lab Med* 1997; 17: 119-28
39. Katoch VM. Advances in molecular diagnosis of tuberculosis. *MJAFI* 2003; 59: 182-86
40. Klatser PR. Amplification reactions in mycobacteriology. *J Microbiol Methods* 1995; 23(1): 75-87
41. Kreck TC, Curtis JR. Rapid diagnosis of pleural tuberculosis by polymerase chain reaction. *Am J Respir Crit Care Med* 1996; 154(6 Pt 1): 1919
42. LoBue PA, Catanzaro A. TB or not TB? Rapid tests for pulmonary tuberculosis. *J Respir Dis* 1997; 18(3): 299-308
43. LoBue PA, Catanzaro A. The diagnosis of tuberculosis. *Dis Mon* 1997; 43(4): 185-246
44. Lodha R, Kabra SK. Newer diagnostic modalities for tuberculosis. *Indian J Pediatr* 2004; 71(3): 221-7
45. Lodha R, Kabra SK. Newer diagnostic modalities for tuberculosis. *Indian J Pediatr* 2004; 71(3): 221-7
46. Macher A, Goosby E, Beller M. PCR and the misdiagnosis of active tuberculosis. *N Engl J Med* 1995; 332(2): 128-29
47. Meador J, Moore D, Weismuller P. Use of nucleic acid amplification tests in the diagnosis and management of tuberculosis. *West J Med.* 1996; 165(3): 140-41
48. Minh VD, Hanh LQ, Vu M. Clinical use of nucleic-acid-amplification tests. *Chest.* 2000; 118(3): 574-75
49. Murdoch DR. Molecular genetic methods in the diagnosis of lower respiratory tract infections. *APMIS.* 2004; 112(11-12): 713-27
50. Pai M. The accuracy and reliability of nucleic acid amplification tests in the diagnosis of tuberculosis. *Natl Med J India* 2004; 17(5): 233-6
51. Piersimani C. Scarparo C. Relevance of Commercial Amplification Methods for Direct Detection of Mycobacterium tuberculosis Complex in Clinical Samples. *J Clin Microbiol* 2003; 41(12): 5355-65
52. Raoult D. Predictive value of PCR applied to clinical samples for Mycobacterium tuberculosis detection. *J Clin Microbiol* 1994; 32(1): 273
53. Rattan A. PCR for the detection of Mycobacterium tuberculosis DNA. *Natl Med J India.* 1995; 8(4): 179-80
54. Richeldi L, Barnini S, Saltini C. Molecular diagnosis of tuberculosis. *Eur Respir J Suppl* 1995; 20: 689s-700s
55. Roth A, Schaberg T, Mauch H. Molecular diagnosis of tuberculosis: current clinical validity and future perspectives. *Eur Respir J* 1997; 10(8): 1877-91
56. Saltini C. Direct amplification of Mycobacterium tuberculosis deoxyribonucleic acid in paucibacillary tuberculosis. *Eur Respir J* 1998; 11(6): 1215-7
57. Schluger NW, Condos R, Levis S, Rom WN. PCR for the detection of Mycobacterium tuberculosis DNA. *Natl Med J India* 1995; 8: 179-80
58. Schluger NW, Rom WN. The polymerase chain reaction in the diagnosis and evaluation of pulmonary infections. *Am J Respir Crit Care Med* 1995; 152(1): 11-6

59. Schluger NW. Changing approaches in the diagnosis of tuberculosis. *Am J Respir Crit Care Med* 2001; 164: 2020-4
60. Schluger NW. The diagnosis of tuberculosis: what's old, what's new. *Semin Respir Infect* 2003; 18(4): 241-8
61. Shah A, Rauf Y. Newer methods for the laboratory diagnosis of tuberculosis. *Jk Practitioner* 2001; 8(4): 266-269
62. Soini H, Viljanen MK. Gene amplification in the diagnosis of mycobacterial infections. *APMIS*. 1997; 105(5): 345-53
63. Su WJ. Recent advances in the molecular diagnosis of tuberculosis. *J Microbiol Immunol Infect* 2002; 35(4): 209-14
64. Trinker M, Hofler G, Sill H. False-positive diagnosis of tuberculosis with PCR. *Lancet* 1996; 348(9038): 1388
65. Tsilimigras CWA, Steyn LM. The rapid laboratory diagnosis of tuberculosis. *South Afr Med J* 1993; 83(9): 699
66. Van Helden PD, Hoal-Van Helden EG. Molecular answers to tuberculous questions. *Lancet* 2000; 356(9248): s61
67. Whelen AC, Persing DH. The role of nucleic acid amplification and detection in the clinical microbiology laboratory. *Annu Rev Microbiol* 1996; 50: 349-73
68. Wilson SM. Detection of *Mycobacterium tuberculosis* by a colorimetric polymerase chain reaction. *Methods Mol Biol* 1998; 101: 363-80
69. Wolska-Goszka L, Dubaniewicz A, Slominski JM. Utility of PCR in bacteriological diagnosis of tuberculosis. *Med Sci Monit* 1997; 3(5): 749-751
70. Woods GL. Molecular methods in the detection and identification of mycobacterial infections. *Arch Pathol Lab Med* 1999; 123(11): 1002-06
71. Woods GL. Molecular techniques in mycobacterial detection. *Arch Pathol Lab Med* 2001; 125(1): 122-26
72. Woods GL. The mycobacteriology laboratory and new diagnostic techniques. *Infect Dis Clin North Am* 2002;16(1):127-44
73. Yang S, Rothman RE. PCR-based diagnostics for infectious diseases: uses limitations and future applications in acute-care settings. *Lancet Infect Dis* 2004; 4: 337-348
74. Aldous WK, Pounder JI, Cloud JL, Woods GL. Comparison of six methods of extracting *Mycobacterium tuberculosis* DNA from processed sputum for testing by quantitative real-time PCR. *J Clin Microbiol* 2005; 43(5): 2471-3
75. Boddingtonhaus B, Rogall T, Flohr T, Blocker H, Bottger EC. Detection and identification of mycobacteria by amplification of rRNA. *J Clin Microbiol* 1990; 28: 1751-59
76. Bollela VR, Sato DN, Fonseca BA. McFarland nephelometer as a simple method to estimate the sensitivity of the polymerase chain reaction using *Mycobacterium tuberculosis* as a research tool. *Braz J Med Biol Res* 1999; 32(9): 1073-6
77. Cormican M, Glennon M, Riain UN, Flynn J. Multiplex PCR for identifying mycobacterial isolates. *J Clin Pathol* 1995; 48(3): 203-05
78. Das S, Paramasiuan CN, Lowrie DB, Prabhakar R, Narayanan PR. IS6110 restriction fragment length polymorphism typing of clinical isolates of *Mycobacterium tuberculosis* from patients with pulmonary tuberculosis in Madras, South India. *Tuber Lung Dis* 1995; 76: 550-554
79. De Beenhouwer H, Liang Z, De Rijk P, Van Eekeren C, Portaels F. Detection and identification of mycobacteria by DNA amplification and oligonucleotide-specific capture plate hybridization. *J Clin Microbiol* 1995; 33(11): 2994-98
80. Desjardin LE, Perkins MD, Teixeira L, Cave MD et al. Alkaline decontamination of sputum adversely affects the stability of mycobacterial mRNA. *J Clin Microbiol* 1996; 34: 2435-39
81. deWit D, Wootton M, Allan B, Steyn L. Simple method for production of internal control DNA for *Mycobacterium tuberculosis* polymerase chain reaction assays. *J Clin Microbiol* 1993; 31(8): 2204-7
82. Diaz R, Montoro E, Maestre JL, Echemendia M, Valdivia JA. Polymerase chain reaction for the detection of *Mycobacterium tuberculosis* complex. *Mem Inst Oswaldo Cruz* 1994; 89(2):211-12
83. Doucet-Populaire F, Lalande V, Carpentier E, Bourgoin A, Dailoux M, Bollet C, Vachee A, Moinard D, Texier-Maugein J, Carbonnelle B, Grosset J. A blind study of the polymerase chain reaction for the detection of *Mycobacterium tuberculosis* DNA. *Azay Mycobacteria Study Group. Tuber Lung Dis* 1996; 77(4): 358-62

84. Dziadek J, Wolinska I, Sajduda A, Dela A, McFadden JJ. IS1607, a single-copy insertion sequence-related element of the *Mycobacterium tuberculosis* complex. *Int J Tuberc Lung Dis* 2000; 4(11): 1078-81
85. Eisenach KD, Cave D, Bates JH, Crawford JT. Polymerase chain reaction amplification of a repetitive DNA sequence specific for *Mycobacterium tuberculosis*. *J Infect Dis* 1990; 161: 977-81
86. Forbes B, Hicks K. Substances interfering with direct detection of *Mycobacterium tuberculosis* in clinical specimens by PCR: effects of bovine serum albumin. *J Clin Microbiol* 1996; 34(9): 2125-28
87. Fries JWU, Patel RJ, Piessens WF, Wirth DF. Detection of untreated mycobacteria by using polymerase chain reaction and specific DNA probes. *J Clin Microbiol* 1991; 29: 1744-47
88. Fries JWU, Patel RJ, Piessens WF, Wirth DF. Genus and species-specific DNA probes to identify *Mycobacteria* using the polymerase chain reaction. *Mol Cell Probes* 1990; 4: 87-105
89. Gillespie SH, McHugh TD, Newport LE. Specificity of IS6110-based amplification assays for *Mycobacterium tuberculosis* complex. *J Clin Microbiol* 1997; 35(3): 799-801
90. Githui WA, Wilson SM, Drobniowski FA. Specificity of IS6110-based DNA fingerprinting and diagnostic techniques for *Mycobacterium tuberculosis* complex. *J Clin Microbiol* 1999; 37(4): 1224-26
91. Glennon M, Smith T, Cormican M, Noone D, Barry T, Maher M, Dawson M, Gilmartin JJ, Gannon F. The ribosomal intergenic spacer region: a target for the PCR based diagnosis of tuberculosis. *Tuber Lung Dis* 1994; 75(5): 353-60
92. Haas WH, Ray Butler W, Woodley CL, Crawford JT. Mixed linker polymerase chain reaction: a new method for rapid fingerprinting of isolates of the *Mycobacterium Tuberculosis* complex. *J Clin Microbiol* 1993; 31: 1293-98
93. Hance AJ, Grandchamp B, Levy-Frebault V, Lecossier D, Rauzier J, Bocart D, Gicquel B. Detection and identification of mycobacteria by amplification of mycobacterial DNA. *Mol Microbiol* 1989; 3: 843-49
94. Heyderman RS, Goyal M, Roberts P, Ushewokunze S, Zizhou S, Marshall BG, Makombe R, Van Embden JD, Mason PR, Shaw RJ. Pulmonary tuberculosis in Harare, Zimbabwe: analysis by spoligotyping. *Thorax* 1998; 53(5): 346-50
95. Hellyer TJ, DesJardin LE, Assaf MK, Bates JH, Cave D, Eisenach KD. Specificity of IS6110-based amplification assay for *Mycobacterium tuberculosis* complex. *J Clin Microbiol* 1996; 34: 2843-46
96. Hermans PW, Schuitema AR, Van Soolingen D, Verstynen CPHJ, Bik EM, Thole JER, Kolk AHJ, Van Embden JDA. Specific detection of *Mycobacterium tuberculosis* complex strains by polymerase chain reaction. *J Clin Microbiol* 1990; 28: 1204-13
97. Hermans PW, van Soolingen D, Dale JW, Schuitema AR, McAdam RA, Catty D, van Embden JD. Insertion element IS986 from *Mycobacterium tuberculosis*: a useful tool for diagnosis and epidemiology of tuberculosis. *J Clin Microbiol* 1990; 28(9): 2051-8
98. Iovannisci DM, Winn-deen ES. Ligation amplification and fluorescence detection of *Mycobacterium tuberculosis* DNA. *Mol Cell Probes* 1993; 7: 35-43
99. Kamerbeek J, Schouls I, Kolk A, Van Agterveld M, Van Soolingen D, Kuijper S, Bunschoten A, Molhuizen H, Shaw R, Goyal M, Van Embden J. Simultaneous detection and strain differentiation of *Mycobacterium tuberculosis* for diagnosis and epidemiology. *J Clin Microbiol* 1997; 35(4): 907-14
100. Kikuchi Y, Oka S, Kimura S, Mitamura K, Shimada K. Clinical application of the polymerase chain reaction for a rapid diagnosis of *Mycobacterium tuberculosis* infection. *Intern Med* 1992; 31(8): 1016-22
101. Kolk AH, Noordhoek GT, de Leeuw O, Kuijper S, van Embden JD. *Mycobacterium smegmatis* strain for detection of *Mycobacterium tuberculosis* by PCR used as internal control for inhibition of amplification and for quantification of bacteria. *J Clin Microbiol* 1994; 32(5): 1354-6
102. Kontos F, Petinaki E, Gitti Z, Costopoulos C, Anagnostou S, Tselentis I, Maniatis AN. Combined use of the fully automated Bactec MGIT 960 System and a PCR-restriction fragment length polymorphism analysis for routine detection and identification of mycobacteria from clinical samples. *J Microbiol Methods* 2003; 52(1): 137-40
103. Lin IJ, Che MJ, Yeh A, Hwang JJ, Wei CY, Tsao WL, Lee CP. Comparison of the sensitivity and specificity of an automatic ligase chain reaction assay system with a one-step polymerase

- chain reaction assay in the diagnosis of *Mycobacterium tuberculosis* complex. *Changgeng Yi Xue Za Zhi* 1999; 22(2): 204-11
104. Linton CJ, Jalal H, Leeming JP, Millar MR. Rapid discrimination of *Mycobacterium tuberculosis* strains by random amplified polymorphic DNA analysis. *J Clin Microbiol* 1994; 32: 2169-74
  105. Little MC, Andrews J, Moore R, Bustos S, Jones L, Embres C, Durmowicz G, Harris J, Berger D, Yanson K, Rostkowski C, Yursis D, Price J, Fort T, Walters A, Collis M, Llorin O, Wood J, Failing F, O'Keefe C, Scrivens B, Pope B, Hansen T, Marino K, Williams K, Boenisch N. Strand displacement amplification and homogeneous real-time detection incorporated in a second-generation DNA probe system, BDProbeTecET. *Clin Chem* 1999; 45(6): 777-84
  106. Little MC, Spears PA, Shank DD. Nucleotide sequence and strand displacement amplification of the 70K protein gene from mycobacteria. *Mol Cell Probes* 1994; 8(5): 375-84
  107. Mulcahy GM, Kaminski ZC, Albanese EA, Sood R, Pierce M. IS6110-based PCR methods for detection of *Mycobacterium tuberculosis*. *J Clin Microbiol* 1996; 34(5): 1348-9
  108. Niemann S, Harmsen D, Rusch-Gerdes S, Richter E. Differentiation of clinical *Mycobacterium tuberculosis* complex isolates by *gyrB* DNA sequence polymorphism analysis. *J Clin Microbiol* 2000; 38(9): 3231-34
  109. Noordhoek GT, Kolk AHJ, Bjune G, Catty D, Dale JW, Fine PEM, Godfrey-Fausset P, Cho S, Shinnick T, Svenson SB, Wilson S, Van Embden JDA. Sensitivity and specificity of PCR for detection of *Mycobacterium tuberculosis*: a blind comparison study among seven laboratories. *J Clin Microbiol* 1994; 32: 277-84
  110. Noordhoek GT, van Embden JD, Kolk AH. Reliability of nucleic acid amplification for detection of *Mycobacterium tuberculosis*: an international collaborative quality control study among 30 laboratories. *J Clin Microbiol* 1996; 34(10): 2522-5
  111. Noordhoek GT, Van Embden JDA, Kolk AHJ. Questionable reliability of the polymerase chain reaction in the detection of *Mycobacterium tuberculosis*. *N Eng J Med* 1993; 329: 2036
  112. Oggioni MR, Fattorini L, Li B, De Milito A, Zazzi M, Pozzi G, Orefici G, Valensin PE. Identification of *Mycobacterium tuberculosis* complex, *Mycobacterium avium* and *Mycobacterium intracellulare* by selective nested polymerase chain reaction. *Mol Cell Probes* 1995; 9(5): 321-26
  113. Patel RJ, Fries JWU, Piessens WF, Wirth DF. Sequence analysis and amplification by polymerase chain reaction of cloned DNA fragment for identification *Mycobacterium tuberculosis*. *J Clin Microbiol* 1990; 28: 513-18
  114. Patel S, Yates M, Sauders NA. PCR Enzyme Linked Immunosorbent Assay and partial rRNA gene sequencing: a rational approach to identifying mycobacteria. *J Clin Microbiol* 1997; 35: 2375-23
  115. Peneau A, Moinard D, Berard I, Pascal O, Moisan JP. Detection of mycobacteria using the polymerase chain reaction. *Eur J Clin Microbiol Infect Dis* 1992; 11(3): 270-71
  116. Plikaytis BB, Eisenach KD, Crawford JT, Shinnick TM. Differentiation of *Mycobacterium tuberculosis* and *Mycobacterium bovis* BCG by a polymerase chain reaction assay. *Mol Cell Probes* 1991; 5(3): 215-9
  117. Ridderhof JC, Williams LO, Legois S, Shult PA, Metchock B, Kubista LN, Handsfield JH, Fehd RJ, Robinson PH. Assessment of Laboratory Performance of Nucleic Acid Amplification Tests for Detection of *Mycobacterium tuberculosis*. *J Clin Microbiol* 2003; 41(11): 5258-61
  118. Rodrigo G, Kallenius G, Hoffmann E, Svenson SB. Diagnosis of mycobacterial infections by PCR and restriction enzyme digestion. *Lett Appl Microbiol* 1992; 15(2): 41-4
  119. Ross BC, Dwyer B. Rapid simple method for typing isolates of *Mycobacterium tuberculosis* by using the polymerase chain reaction. *J Clin Microbiol* 1993; 31: 329-34
  120. Shah JS, Liu J, Buxton D, Stone B, Nietupski R, Olive DM, King W, Klinger JD. Detection of *Mycobacterium tuberculosis* directly from spiked human sputum by Q-beta replicase-amplified assay. *J Clin Microbiol* 1995; 33(2): 322-328
  121. Soini H, Bottger EC, Viljanen MK. Identification of mycobacteria by PCR-based sequence determination of the 32-kilodalton protein gene. *J Clin Microbiol* 1994; 32(12): 2944-7
  122. Spargo CA, Fraiser MS, Van Cleve M, Wright DJ, Nycz CM, Spears PA, Walker GT. Detection of *M. tuberculosis* DNA using thermophilic strand displacement amplification. *Mol Cell Probes* 1996; 10(4): 247-56
  123. Spargo CA, Haaland PD, Jurgensen SR, Shank DD, Walker GT. Chemiluminescent detection of strand displacement amplified DNA from species comprising the *Mycobacterium tuberculosis* complex. *Mol Cell Probes* 1993; 7(5): 395-404

124. Suffys P, Palomino JC, Cardoso Leao S, Espitia C, Cataldi A, Alito A, Velasco M, Robledo J, Fernandez J, da Silva Rosa P, Romano MI. Evaluation of the polymerase chain reaction for the detection of *Mycobacterium tuberculosis*. *Int J Tuberc Lung Dis* 2000; 4(2): 179-83
125. Telenti A., Marchesi F, Balz M, Balli F, Bottger EC, Bodmer T. Rapid identification of mycobacteria to the species level by polymerase chain reaction and restriction enzyme analysis. *J Clin Microbiol* 1993; 31: 175-78
126. Tortoli E, Nanetti A, Piersimoni C, Cichero P, Farina C, Mucignat G, Scarparo C, Bartolini L, Valentini R, Nista D, Gesu G, Tosi CP, Crovatto M, Brusarosco G. Performance assessment of new multiplex probe assay for identification of mycobacteria. *J Clin Microbiol* 2001; 39(3): 1079-84
127. Van der Vliet GM, Schukkink RA, van Gemen B, Schepers P, Klatser PR. Nucleic acids sequence-based amplification (NASBA) for the identification of mycobacteria. *J Gen Microbiol* 1993; 139: 2423-29
128. Walker GT, Fraiser MS, Schram JL, Little MC, Nadeau JG, Malinowski DP. Strand displacement amplification –an isothermal, in vitro DNA amplification technique. *Nucleic Acids Res* 1992; 20: 1691-96
129. Walker GT, Linn CP, Nadeau JG. DNA detection by strand displacement amplification and fluorescence polarization with signal enhancement using a DNA binding protein. *Nucleic Acids Res* 1996; 24(2): 348-53
130. Walker GT, Linn CP. Detection of *Mycobacterium tuberculosis* DNA with thermophilic strand displacement amplification and fluorescence polarization. *Clin Chem* 1996; 42(10): 1604-8
131. Walker GT, Little MC, Nadeau JG, Shank DD. Isothermal in vitro amplification of DNA by a restriction enzyme/DNA polymerase system. *Proc Natl Acad Sci U S A* 1992; 89(1): 392-6
132. Walker GT, Nadeau JG, Linn CP, Devlin RF, Dandliker WB. Strand displacement amplification (SDA) and transient-state fluorescence polarization detection of *Mycobacterium tuberculosis* DNA. *Clin Chem* 1996; 42(1): 9-13
133. Walker GT, Nadeau JG, Linn CP. A DNA probe assay using strand displacement amplification (SDA) and filtration to separate reacted and unreacted detector probes. *Mol Cell Probes* 1995; 9(6): 399-403
134. Walker GT, Nadeau JG, Spears PA, Schram JL, Nycz CM, Shank DD. Multiplex strand displacement amplification (SDA) and detection of DNA sequences from *Mycobacterium tuberculosis* and other mycobacteria. *Nucleic Acids Res* 1994; 22: 2670-77
135. Wei CY, Lee CN, Chu CH, Hwang JJ, Lee CP. Determination of the sensitivity and specificity of PCR assays using different target DNAs for the detection of *Mycobacterium tuberculosis*. *Kaohsiung J Med Sci* 1999; 15(7): 396-405
136. Wilton S, Cousins D. Detection and identification of multiple mycobacterial pathogens by DNA amplification in a single tube. *PCR Methods Appl* 1992; 1(4): 269-73
137. Wong DA, Yip PC, Tse DL, Tung VW, Cheung DT, Kam KM. Routine use of a simple low-cost genotypic assay for the identification of mycobacteria in a high throughput laboratory. *Diagn Microbiol Infect Dis* 2003; 47(2): 421-6
138. Zolg JW, Philippi-Schulz S. The superoxide dismutase gene, a target for detection and identification of mycobacteria by PCR. *J Clin Microbiol* 1994; 32: 2801-12
139. Zwadyk P Jr, Down JA, Myers N, Dey MS. Rendering of mycobacteria safe for molecular diagnostic studies and development of a lysis method for strand displacement amplification and PCR. *J Clin Microbiol* 1994; 32(9): 2140-6
140. Abe C, Hirano K, Wada M, Kazumi Y, Takahashi M, Fukasawa Y, Yoshimura T, Miyagi C, Goto S. Detection of *Mycobacterium tuberculosis* in clinical specimens by polymerase chain reaction and Gen-Probe Amplified *Mycobacterium Tuberculosis* Direct Test. *J Clin Microbiol* 1993; 31(12): 3270-74
141. Afghani B, Lieberman JM, Duke MB, Stutman HR. Comparison of quantitative polymerase chain reaction, acid fast bacilli smear, and culture results in patients receiving therapy for pulmonary tuberculosis. *Diagn Microbiol Infect Dis* 1997; 29(2): 73-9
142. Afghani B, Stutman HR. Polymerase chain reaction for diagnosis of *M. tuberculosis*: comparison of simple boiling and a conventional method for DNA extraction. *Biochem Mol Med* 1996; 57(1): 14-8
143. Ahmed N, Mohanty AK, Mukhopadhyay U, Batish VK, Grover S. PCR-based rapid detection of *Mycobacterium tuberculosis* in blood from immunocompetent patients with pulmonary tuberculosis. *J Clin Microbiol* 1998; 36(10): 3094-95

144. Albay A, Kisa O, Baylan O, Doganci L. The evaluation of FASTPlaqueTB test for the rapid diagnosis of tuberculosis. *Diagn Microbiol Infect Dis* 2003; 46(3): 211-5 8
145. Almeda J, Garcia A, Gonzalez J, Quinto L, Ventura PJ, Vidal R, Rufi G, Martinez JA, Jimenez de Anta MT, Trilla A, Alonso PL. Clinical evaluation of an in-house IS6110 polymerase chain reaction for diagnosis of tuberculosis. *Eur J Clin Microbiol Infect Dis* 2000; 19(11): 859-67
146. Altamirano M, Kelly MT, Wong A, Bessuille ET, Black WA, Smith JA. Characterization of a DNA probe for detection of Mycobacterium tuberculosis complex in clinical samples by polymerase chain reaction. *J Clin Microbiol* 1992; 30(8): 2173-2176
147. Amicosante M, Richeldi L, Trenti G, Paone G, Campa M, Bisetti A, Saltini C. Inactivation of polymerase inhibitors for Mycobacterium tuberculosis DNA amplification in sputum using capture resin. *J Clin Microbiol* 1995; 33 (3): 629-630
148. Andersen AB, Thybo S, Godfrey-Faussett P, Stoker NG. Polymerase chain reaction for detection of Mycobacterium tuberculosis in sputum. *Eur J Clin Microbiol Infect Dis* 1993;12(12):922-27
149. Araj GF, Talhouk RS, Itani LY, Jaber W, Jamaledine GW. Comparative performance of PCR-based assay versus microscopy and culture for the direct detection of Mycobacterium tuberculosis in clinical respiratory specimens in Lebanon. *Int J Tuberc Lung Dis* 2000; 4(9): 877-81
150. Arimura M, Ohuchi T, Suzuki Y, Hishinuma A, Oikawa S, Sato J, Ieiri T. Clinical significance of direct detection of Mycobacterium tuberculosis in respiratory specimens by polymerase chain reaction. *Dokkyo J Med Sci* 1996; 23: 143-148
151. Aslanzadeh J, de la Viuda M, Fille M, Smith WB, Namdari H. Comparison of culture and acid-fast bacilli stain to PCR for detection of Mycobacterium tuberculosis in clinical samples. *Mol Cell Probes* 1998; 12(4): 207-11
152. Bahrmand AR, Bakayev VV, Babaei MH. - Use of polymerase chain reaction for primary diagnosis of pulmonary tuberculosis in the clinical laboratory. *Scand J Infect Dis* 1996; 28(5): 469-72
153. Beige J, Lokies J, Schaberg T, Finckh U, Fischer M, Mauch H, Lode H, Kohler B, Rolfs A. - Clinical evaluation of a Mycobacterium tuberculosis PCR assay. *J Clin Microbiol* 1995; 33(1): 90-5
154. Bhattacharya B. Karak K. Ghosal AG. Roy A. Das S. Dandapat P. Khetawat D. Mondal DK. Bhattacharya S. Chakrabarti S. Development of a new sensitive and efficient multiplex polymerase chain reaction (PCR) for identification and differentiation of different mycobacterial species. *Tropical Medicine & International Health* 2003; 8(2): 150-7
155. Bi HG, Saito A, Koide M, Ishimine T, Futenma M, Yamashiro Y, Kusano N, Kawakami K. Detection of Mycobacterium tuberculosis in clinical specimens by polymerase chain reaction method. *Kansenshogaku Zasshi* 1995; 69(3): 272-79
156. Bieger WP, Grabnitz F, Pardos D, Raith H, Feldmann K. Direct detection of Mycobacterium tuberculosis in clinical samples: PCR methods in comparison to conventional diagnostic and clinical measures. *Klinisches Labor* 1993; 39(9): 599-605
157. Bindayna KM, Thani A, Baig B, Botta GA. Rapid diagnosis of Mycobacterium tuberculosis by multiplex polymerase chain reaction from clinical specimens. *J Commun Dis* 2001; 33(4): 252-60
158. Borun M, Sajduda A, Pawlowska I, McFadden JJ, Dziadek J. Detection of Mycobacterium tuberculosis in clinical samples using insertion sequences IS6110 and IS990. *Tuberculosis (Edinb)* 2001;81(4):271-78
159. Brisson-Noel A, Gicquel B, Lecossier D, Levy-Frebault V, Nassif X, Hance AJ. Rapid diagnosis of tuberculosis by amplification of mycobacterial DNA in clinical samples. *Lancet* 1989; 2(8671): 1069-71
160. Brisson-Noel, A., C. Aznar, C. Chureau, S. Nguyen, C. Pierre, M. Bartoli, R. Bonete, G. Pialoux, B. Gicquel, Garrigue G. Diagnosis of tuberculosis by DNA amplification in clinical practice. *Lancet* 1991; 338: 364-66
161. Broccolo F, Scarpellini P, Locatelli G, Zingale A, Brambilla AM, Cichero P, Sechi LA, Lazzarin A, Lusso P, Malnati MS. Rapid diagnosis of mycobacterial infections and quantitation of Mycobacterium tuberculosis load by two real-time calibrated PCR assays. *J Clin Microbiol* 2003; 41(10): 4565-72

162. Brugiére O, Vokurka M, Lecossier D, Mangiapan G, Amrane A, Milleron B, Mayaud C, Cadranel J, Hance AJ. Diagnosis of smear-negative pulmonary tuberculosis using sequence capture polymerase chain reaction. *Am J Respir Crit Care Med* 1997; 155(4): 1478-81
163. Buck GE, O'Hara LC, Summersgill JT. Rapid, simple method for treating clinical specimens containing *Mycobacterium tuberculosis* to remove DNA for polymerase chain reaction. *J Clin Microbiol* 1992; 30:1331-34
164. Canbolat O, Ulusdoyuran S, Ozgen G, Ceyhan I, Gumuslu F, Akbay A. The comparison of adenosine deaminase activity values with polymerase chain reaction results in patients with tuberculosis. *J Clin Lab Anal* 1999; 13(5): 209-12
165. Cataloluk O, Karsligil T, Bayazit N. Evaluation of a polymerase chain reaction amplification method for *Mycobacterium tuberculosis* complex on samples from different sources. *Scand J Infect Dis* 2003; 35(5): 329-31
166. Chan CM, Yuen KY, Chan KS, Yam WC, Yim KH, Ng WF, Ng MH. Single-tube nested PCR in the diagnosis of tuberculosis. *J Clin Pathol* 1996; 49(4): 290-94
167. Chapin K, Lauderdale TL. Evaluation of rapid air thermal cycler for detection of *Mycobacterium tuberculosis*. *J Clin Microbiol* 1997; 35(8): 2157-59
168. Charoenratanakul S, Chaiprasert A, Yenchtsomanas P, Pattanakitsakul S, Jearanaisilavong J, Dejsomritrutai W. Clinical utility of the polymerase chain reaction in bronchoalveolar lavage in the diagnosis of smear negative pulmonary tuberculosis. *Thai J Tuberc Chest Dis* 1996; 17:1-9
169. Chen NH, Liu YC, Tsao TC, Wu TL, Hsieh MJ, Chuang ML, Huang CC, Kuo AJ, Chen MC, Yang CT. Combined bronchoalveolar lavage and polymerase chain reaction in the diagnosis of pulmonary tuberculosis in smear-negative patients. *Int J Tuberc Lung Dis* 2002; 6(4): 350-55
170. Cheng VC, Yam WC, Hung IF, Woo PC, Lau SK, Tang BS, Yuen KY. Clinical evaluation of the polymerase chain reaction for the rapid diagnosis of tuberculosis. *J Clin Pathol*. 2004; 57(3):281-5
171. Chierakul N, Anantasetagoon T, Chaiprasert A, Tingtoy N. Diagnostic value of gastric aspirate smear and polymerase chain reaction in smear-negative pulmonary tuberculosis. *Respirology* 2003; 8(4): 492-6
172. Cho SN, Van der Vliet GME, Park S, Baik SH, Kim SK, Chong Y, Kolk AHJ, Klatser PR, Kim JD. Colorimetric Microwell plate hybridization assay for detection of amplified *Mycobacterium tuberculosis* DNA from sputum samples. *J. Clin. Microbiol* 1995; 33(3): 752-54
173. Choi YJ, Hu Y, Mahmood A. Clinical significance of a polymerase chain reaction assay for the detection of *Mycobacterium tuberculosis*. *Am J Clin Pathol* 1996; 105(2): 200-04
174. Clarridge JE, Shawar RM, Shinik TM, Plikaytis BB. Large-scale use of polymerase chain reaction for detection of *Mycobacterium tuberculosis* in routine mycobacteriology laboratory. *J Clin Microbiol* 1993; 31: 2049-56
175. Cormican MG, Glennon M, Riain UN, Smith T, Flynn J, Gannon F. Evaluation of a PCR assay for detection of *Mycobacterium tuberculosis* in clinical specimens. *Diagn Microbiol Infect Dis* 1995; 22(4): 357-60
176. Cousins DV, Wilton SD, Francis BR, Gow BL. Use of polymerase chain reaction for rapid diagnosis of tuberculosis. *J Clin Microbiol* 1992; 30(1): 255-58
177. Dar L, Sharma SK, Bhanu NV, Broor S, Chakraborty M, Pande JN, Seth P. Diagnosis of pulmonary tuberculosis by polymerase chain reaction for MPB64 gene: an evaluation in a blind study. *Indian J Chest Dis Allied Sci* 1998; 40(1): 5-16
178. Del Portillo P, Murillo LA, Patarroyo ME. Amplification of a species-specific DNA fragment of *Mycobacterium tuberculosis* and its possible use in diagnosis. *J Clin Microbiol* 1991; 29(10): 2163-68
179. Del Portillo P, Thomas MC, Martinez E, Maranon C, Valladares B, Patarroyo ME, Carlos Lopez M. Multiprimer PCR system for differential identification of mycobacteria in clinical samples. *J Clin Microbiol* 1996; 34(2): 324-28
180. Desjardin LE, Chen Y, Perkins MD, Teixeira L, Cave MD, Eisenach KD. Comparison of the ABI 7700 system (TaqMan) and competitive PCR for quantification of IS6110 DNA in sputum during treatment of tuberculosis. *J Clin Microbiol* 1998; 36(7): 1964-68
181. Desjardin LE, Perkins MD, Wolski K, Haun S, Teixeira L, Chen Y, Johnson JL, Ellner JJ, Dietze R, Bates J, Cave MD, Eisenach KD. Measurement of sputum *Mycobacterium tuberculosis* messenger RNA as a surrogate for response to chemotherapy. *Am J Respir Crit Care Med* 1999; 160(1): 203-10

182. Drobniowski FA, Watterson SA, Wilson SM, Harris GS. A clinical, microbiological and economic analysis of a national service for the rapid molecular diagnosis of tuberculosis and rifampicin resistance in *Mycobacterium tuberculosis*. *J Med Microbiol* 2000; 49(3): 271-8
183. Drosten C, Panning M, Kramme S. Detection of *Mycobacterium tuberculosis* by real-time PCR using pan-mycobacterial primers and a pair of fluorescence resonance energy transfer probes specific for the *M. tuberculosis* complex. *Clin Chem* 2003; 49(10): 1659-61
184. Dubiley S, Mayorova A, Ignatova A, Kirillov E, Stepanshina V, Kolesnikov A, Shemyakin I. New PCR-based assay for detection of common mutations associated with rifampin and isoniazid resistance in *Mycobacterium tuberculosis*. *Clin Chem* 2005; 51(2): 447-50
185. Eisenach KD, Siffford MD, Cave MD, Bates JH, Crawford JT. Detection of *Mycobacterium tuberculosis* in sputum samples using a polymerase chain reaction. *Am Rev Respir Dis* 1991; 144(5): 1160-63
186. Fang F, Xiang Z, Chen R. Establishment of a multiplex PCR system to diagnose tuberculosis and other bacterial infections. *J Tongji Med Univ* 2000; 20(4): 324-6
187. Fauville-Dufaux M, Vanfleteren B, De Witt L, Vincke JP, Van Vooren JP, Yates MD, Serruys E, Content J. Rapid detection of tuberculous and non-tuberculous mycobacteria by polymerase chain reaction amplification of a 162 bp DNA fragment from antigen 85. *Eur J Clin Microbiol Infect Dis* 1992; 11: 979-803
188. Fauville-Dufaux M, Waelbroeck A, De Mol P, Vanfleteren B, Levy J, Debusschere P, Farber CM. Contribution of the polymerase chain reaction to the diagnosis of tuberculous infections in children. *Eur J Pediatr* 1996; 155(2):106-11
189. Folgueira L, Delgado R, Palenque E, Noriega AR. Detection of *Mycobacterium tuberculosis* DNA in clinical sample by using a simple lysis method and polymerase chain reaction. *J Clin Microbiol* 1993; 31: 1019-21
190. Forbes BA, Hicks KE. Direct detection of *Mycobacterium tuberculosis* in respiratory specimens in a clinical laboratory by polymerase chain reaction. *J Clin Microbiol* 1993; 31(7): 1688-94
191. Garcia-Quintanilla A, Garcia L, Tudo G, Navarro M, Gonzales J, Jimenez de Anta MT. Single tube balanced heminested PCR for detecting *Mycobacterium tuberculosis* in smear negative samples. *J Clin Microbiol* 2000; 1166-69
192. Garcia-Quintanilla A, Gonzalez-Martin J, Tudo G, Espasa M, Jimenez de Anta MT. Simultaneous identification of *Mycobacterium* genus and *Mycobacterium tuberculosis* complex in clinical samples by 5'-exonuclease fluorogenic PCR. *J Clin Microbiol* 2002; 40(12): 4646-51
193. Gengvinij N, Pattanakitsakul SN, Chierakul N, Chairprasert A. Detection of *Mycobacterium tuberculosis* from sputum specimens using one-tube nested PCR. *Southeast Asian J Trop Med Public Health* 2001; 32(1): 114-25
194. Ginesu F, Pirina P, Sechi LA, Molicotti P, Santoru L, Porcu L, Fois A, Arghittu P, Zanetti S, Fadda G. Microbiological diagnosis of tuberculosis: a comparison of old and new methods. *J Chemother* 1998; 10(4): 295-300
195. Gomez-Pastrana D, Torronteras R, Caro P, Anguita ML, Barrio AM, Andres A, Navarro J. Diagnosis of tuberculosis in children using a polymerase chain reaction. *Pediatr Pulmonol* 1999; 28(5): 344-51
196. Gori A, Franzetti F, Marchetti G, Catozzi L, Corbellino M. Specific detection of *Mycobacterium tuberculosis* by mtp40 nested PCR. *J Clin Microbiol* 1996; 34(11): 2866-67
197. Gunisha P, Madhavan HN, Jayanthi U, Therese KL. Polymerase chain reaction using IS6110 primer to detect *Mycobacterium tuberculosis* in clinical samples. *Indian J Pathol Microbiol* 2000; 43(4): 395-402
198. Hashimoto T, Suzuki K, Amitani R, Kuze F. Rapid detection of *Mycobacterium tuberculosis* in sputa by the amplification of IS6110. *Intern Med* 1995; 34(7): 605-10
199. Heginbothom ML, Magee JT, Flanagan PG. Evaluation of the Idaho Technology LightCycler PCR for the direct detection of *Mycobacterium tuberculosis* in respiratory specimens. *Int J Tuberc Lung Dis* 2003; 7(1): 78-83
200. Hellyer TJ, DesJardin LE, Hehman GL, Cave MD, Eisenach KD. Quantitative analysis of mRNA as a marker for viability of *Mycobacterium tuberculosis*. *J Clin Microbiol* 1999; 37(2): 290-5
201. Hellyer TJ, DesJardin LE, Teixeira L, Perkins MD, Cave MD, Eisenach KD. Detection of viable *Mycobacterium tuberculosis* by reverse transcriptase-strand displacement amplification of mRNA. *J Clin Microbiol* 1999; 37(3): 518-23



202. Hellyer TJ, Fletcher TW, Bates JH, Stead WW, Templeton GL, Cave MD, Eisenach KD. Strand displacement amplification and the polymerase chain reaction for monitoring response to treatment in patients with pulmonary tuberculosis. *J Infect Dis* 1996; 173(4): 934-41
203. Hernandez Abanto SM, Hirata MH, Hirata RD, Mamizuka EM, Schmal M, Hoshino-Shimizu S. Evaluation of Henes-PCR assay for Mycobacterium detection in different clinical specimens from patients with or without tuberculosis-associated HIV infection. *J Clin Lab Anal* 2000; 14(5): 238-45
204. Herrera EA, Segovia M. Evaluation of mtp40 genomic fragment amplification for specific detection of Mycobacterium tuberculosis in clinical specimens. *J Clin Microbiol* 1996; 34: 1108-13
205. Herrera-Leon L, Molina T, Saiz P, Saez-Nieto JA, Jimenez MS. New multiplex PCR for rapid detection of isoniazid-resistant Mycobacterium tuberculosis clinical isolates. *Antimicrob Agents Chemother* 2005; 49(1): 144-7
206. Heyderman RS, Goyal M, Roberts P, Ushewokunze S, Zizhou S, Marshall BG, Makombe R, Van Embden JD, Mason PR, Shaw RJ. Pulmonary tuberculosis in Harare, Zimbabwe: analysis by spoligotyping. *Thorax* 1998; 53(5): 346-50
207. Hidaka E, Honda T, Ueno I, Yamasaki Y, Kubo K, Katsuyama T. Sensitive identification of mycobacterial species using PCR-RFLP on bronchial washings. *Am J Respir Crit Care Med* 2000; 161: 930-34
208. Ikonomopoulos JA, Gorgoulis VG, Zacharatos PV, Kotsinas A, Tsoli E, Karameris A, Panagou P, Kittas C. Multiplex PCR assay for the detection of mycobacterial DNA sequences directly from sputum. *In Vivo* 1998; 12(5): 547-52
209. Inyaku K, Hiyama K, Ishioka S, Inamizu T, Yamakido M. Rapid detection and identification of mycobacteria in sputum samples by nested polymerase chain reaction and restriction fragment length polymorphisms of dnaJ heat shock protein gene. *Hiroshima J Med Sci* 1993; 42(1): 21-31
210. Issa R, Ayob H, Yasin RM. Detection of Mycobacterium tuberculosis in patients with HIV infection using PCR and nonradioactive detection system. *International Medical Journal* 1998; 5(4): 273-6
211. Jatana SK, Nair MN, Lahiri KK, Sarin NP. Polymerase chain reaction in the diagnosis of tuberculosis. *Indian Pediatr* 2000; 37(4): 375-82
212. Jou NT, Yoshimori RB, Mason GR, Louie JS, Liebling MR. Single-tube, nested, reverse transcriptase PCR for detection of viable Mycobacterium tuberculosis. *J Clin Microbiol* 1997; 35(5): 1161-65
213. Kadival GV, D'Souza CD, Kolk AH, Samuel AM. Polymerase chain reaction in the diagnosis of tuberculosis. Comparison of two target sequences for amplification. *Zentralbl Bakteriol* 1995; 282(4): 353-61
214. Kamerbeek J, Schouls I, Kolk A, Van Agterveld M, Van Soolingen D, Kuijper S, Bunschoten A, Molhuizen H, Shaw R, Goyal M, Van Embden J. Simultaneous detection and strain differentiation of Mycobacterium tuberculosis for diagnosis and epidemiology. *J Clin Microbiol* 1997; 35(4): 907-14
215. Kearns AM, Freeman R, Steward M. Evaluation of a rapid thermal cycler for detection of Mycobacterium tuberculosis. *J Clin Microbiol* 1998; 36(2): 604
216. Kennedy, N, Gillespie SH, Saruni AOS, Kisyombe G, McNerney G, Ngowi FI, Wilson S. Polymerase chain reaction for assessing treatment response in patients with pulmonary tuberculosis. *J Infect Dis* 1994; 170 : 713-16
217. Khandekar P, Amin A., Reddy PP, Banwalikar JN, Channapa, Shivannaure T, Katoch VM. Evaluation of PCR- based test for the detection of mycobacterium tuberculosis in coded sputum specimens. *Indian J Med Res* 1994; 100: 167-71
218. Kirschner P, Rosenau J, Springer B, Teschner K, Feldmann K, Bottger EC. Diagnosis of mycobacterial infections by nucleic acid amplification: 18-month prospective study. *J Clin Microbiol* 1996; 34(2): 304-12
219. Kocagoz T, Yilmaz E, Ozkara S, Kocagoz S, Hayran M, Sachedeva M, Chambers HF. Detection of Mycobacterium tuberculosis in sputum samples by polymerase chain reaction using a simplified procedure. *J Clin Microbiol* 1993; 31(6): 1435-38
220. Kolk AHJ, Schuitema ARJ, Kuijper S, VanLeeuwen J, Hermans PWM, Van Embden JDA, and Hartskeel RA. Detection of Mycobacterium tuberculosis in clinical samples by using polymerase chain reaction and a non-radioactive detection system. *J Clin Microbiol* 1992; 30: 2567-75

221. Kox LF, Jansen HM, Kuijper S, Kolk AH. Multiplex PCR assay for immediate identification of the infecting species in patients with mycobacterial disease. *J Clin Microbiol* 1997; 35(6): 1492-98
222. Kox LF, van Leeuwen J, Knijper S, Jansen HM, Kolk AH. PCR assay based on DNA coding for 16S rRNA for detection and identification of mycobacteria in clinical samples. *J Clin Microbiol* 1995; 33(12): 3225-33
223. Kox LFF, Rhienthong D, Medo Miranda AM, Udomsantisuk N, Ellis K, Van Leeuwen J, Van Heusden S, Kuijper S, Kolk AHJ. A more reliable PCR for detection of *Mycobacterium tuberculosis* in clinical sample. *J Clin Microbiol* 1994; 32: 672-78
224. Kraus G, Cleary T, Miller N, Seivright R, Young AK, Spruill G, Hnatyszyn HJ. Rapid and specific detection of the *Mycobacterium tuberculosis* complex using fluorogenic probes and real-time PCR *Mol Cell Probes* 2001; 15(6): 375-83
225. Lazraq R, el Baghdadi J, Guesdon JL, Benslimane A. Evaluation of IS6110 as amplification target for direct tuberculosis diagnosis. *Pathol Biol (Paris)* 1999; 47(8): 790-96
226. Levee G, Glaziou P, Gicquel B, Chanteau S. Follow-up of tuberculosis patients undergoing standard anti-tuberculosis chemotherapy by using a polymerase chain reaction. *Res Microbiol* 1994; 145(1): 5-8
227. Liam CK, Chen YC, Yap SF, Srinivas P, Poi PJ. Detection of *Mycobacterium tuberculosis* in bronchoalveolar lavage from patients with sputum smear-negative pulmonary tuberculosis using a polymerase chain reaction assay. *Respirology* 1998; 3(2): 125-29
228. Maher M, Glennon M, Martinazzo G, Turchetti E, Marcolini S, Smith T, Dawson MT. Evaluation of a novel PCR-based diagnostic assay for detection of *Mycobacterium tuberculosis* in sputum samples. *J Clin Microbiol* 1996; 34(9): 2307-8
229. Mangiapan G, Vokurka M, Schouls L, Cadranel J, Lecossier D, van Embden J, Hance A. Sequence capture-PCR improves detection of mycobacterial DNA in clinical specimens. *J Clin Microbiol* 1996; 34: 1209-15
230. Manjunath N, Shankar P, Rajan L, Bhargava A, Saluja S, Shrinivas. Evaluation of a polymerase chain reaction for the diagnosis of tuberculosis. *Tubercle* 1991; 72(1): 21-27
231. Marei AM, El-Behedy EM, Mohtady HA, Afify AF. Evaluation of a rapid bacteriophage-based method for the detection of *Mycobacterium tuberculosis* in clinical samples. *J Med Microbiol* 2003; 52(4): 331-335
232. Marin M, Garcia de Viedma D, Ruiz-Serrano MJ, Bouza E. Rapid direct detection of multiple rifampin and isoniazid resistance mutations in *Mycobacterium tuberculosis* in respiratory samples by real-time PCR. *Antimicrob Agents Chemother* 2004; 48(11): 4293-300
233. Mayta H, Gilman RH, Arenas F, Valencia T, Caviedes L, Montenegro SH, Ticona E, Ortiz J, Chumpitaz R, Evans CA, Williams DL. Evaluation of a PCR-Based Universal Heteroduplex Generator Assay As A Tool for Rapid Detection of Multidrug-Resistant *Mycobacterium tuberculosis* in Peru. *J Clin Microbiol* 2003; 41(12): 5774-77
234. Mitarai S, Oishi K, Fukasawa M, Yamashita H, Nagatake T, Matsumoto K. Clinical evaluation of polymerase chain reaction DNA amplification method for the diagnosis of pulmonary tuberculosis in patients with negative acid-fast bacilli smear. *Tohoku J Exp Med* 1995; 177(1): 13-23
235. Miyazaki K., Koga H, Kohno S, Kaku M. Nested polymerase chain reaction for detection of *Mycobacterium tuberculosis* in clinical samples. *J Clin Microbiol* 1993; 31: 2228-32
236. Montenegro SH, Gilman RH, Sheen P, Cama R, Caviedes L, Hopper T, Chambers R, Oberhelman RA. Improved detection of *Mycobacterium tuberculosis* in Peruvian children by use of a heminested IS6110 polymerase chain reaction assay. *Clin Infect Dis* 2003; 36(1): 16-23
237. Mustafa AS, Abal AT, Chugh TD. Detection of *Mycobacterium tuberculosis* complex and non-tuberculous mycobacteria by multiplex polymerase chain reactions. *East Mediterr Health J* 1999; 5(1): 61-70
238. Mustafa AS, Ahmed A, Abal AT, Chugh TD. Establishment and evaluation of a multiplex polymerase chain reaction for detection of mycobacteria and specific identification of *Mycobacterium tuberculosis* complex. *Tuber Lung Dis* 1995; 76(4): 336-43
239. Nastasi A, Mammaia C, Lucia DC. Contribution of nucleic acid amplification to diagnosis of pulmonary tuberculosis. *Ann Ig* 1997; 9(5): 347-52

240. Negi SS, Khan SF, Gupta S, Pasha ST, Khare S, Lal S. Comparison of the conventional diagnostic modalities, bactec culture and polymerase chain reaction test for diagnosis of tuberculosis. *Indian J Med Microbiol* 2005; 23(1): 29-33
241. Nolte FS, Metchock B, McGowan JE Jr, Edwards A, Okwumabua O, Thurmond C, Mitchell PS, Plikaytis B, Shinnick T. Direct detection of *Mycobacterium tuberculosis* in sputum by polymerase chain reaction and DNA hybridization. *J Clin Microbiol* 1993; 31(7): 1777-82
242. Noordhoek GT, Kaan JA, Mulder S, Wilke H, Kolk AHJ. Application of the polymerase chain reaction in a routine microbiology laboratory for detection of *Mycobacterium tuberculosis* in clinical samples. *J Clin Pathol* 1995; 48: 810-14
243. Palacios JJ, Ferro J, Telenti M, Roces SG, Prendes P, Garcia JM, Nicolas AI, Rodrigues J, Villar H, de Quiros JF. Comparison of solid and liquid culture media with polymerase chain reaction for detection of *Mycobacterium tuberculosis* in clinical samples. *Eur J Clin Microbiol Infect Dis* 1996; 15(6): 478-83
244. Palenque E, Rebollo MJ, Garcia-Bravo M, Aguado JM. Polymerase chain reaction for assessing treatment response in patients with pulmonary tuberculosis. *J Infect Dis* 1995; 172(2): 608-9
245. Pao CC, Benedict Yen TS, You JB, Maa JS, Fiss EH, Chang CH. Detection and identification of *Mycobacterium tuberculosis* by DNA amplification. *J. Clin Microbiol* 1990; 28:1877-80
246. Parvez MA, Hasan KN, Rumi MA, Ahmed S, Salimullah M, Tahera Y, Gomes DJ, Huq F, Hassan MS. PCR can help early diagnosis of pulmonary tuberculosis. *Southeast Asian J Trop Med Public Health* 2003; 34(1): 147-53
247. Patnaik M, Liegmann K, Peter JB. Rapid detection of smear-negative *Mycobacterium tuberculosis* by PCR and sequencing for rifampin resistance with DNA extracted directly from slides. *J Clin Microbiol* 2001; 39(1): 51-52
248. Perera J, Chandrasekharan NV, Karunanayake EH. PCR based detection of *Mycobacterium tuberculosis*: effect of sample preparation. *Southeast Asian J Trop Med Public Health* 1994; 25(4): 693-7
249. Pierre C, Lecossier D, Bousougant Y, Bocart D, Joly V, Yeni P, Hance AJ. Use of a reamplification protocol improves sensitivity of detection of *Mycobacterium tuberculosis* in clinical sample by amplification of DNA. *J Clin Microbiol* 1991; 29: 712-17
250. Pietrzak J, Frei R, Senn P, Moroni C. Comparison of polymerase chain reaction with standard methods in the diagnosis of mycobacterium tuberculosis infection. *Eur J Clin Microbiol Infect Dis* 1994; 13: 1079-83
251. Querol JM, Farga MA, Granda D, Gimeno C, Garcia-de-Lomas J. The utility of polymerase chain reaction (PCR) in the diagnosis of pulmonary tuberculosis. *Chest* 1995;107(6): 1631-35
252. Ranganathan I, Menon MM. Evaluation of various modalities for the diagnosis of tuberculosis in body fluids. *Indian J Pathol Microbiol* 1999; 42(4): 435-39
253. Reischl U, Pulz M, Ehret W, Wolf H. PCR-based detection of mycobacteria in sputum samples using a simple and reliable DNA extraction protocol. *Biotechniques* 1994;17(5):844-5
254. Rindi L, Bianchi L, Tortoli E, Lari N, Bonanni D, Garzelli C. A real-time PCR assay for detection of isoniazid resistance in *Mycobacterium tuberculosis* clinical isolates. *J Microbiol Methods* 2003; 55(3): 797-800
255. Ritis K, Tzoanopoulos D, Speletas M, Papadopoulos E, Arvanitidis K, Kartali S, Sideras P. Amplification of IS6110 sequence for detection of *Mycobacterium tuberculosis* complex in HIV-negative patients with fever of unknown origin (FUO) and evidence of extrapulmonary disease. *J Intern Med* 2000; 248(5): 415-24
256. Rodriguez JC, Fuentes E, Royo G. Comparison of two different PCR detection methods. Application to the diagnosis of pulmonary tuberculosis. *APMIS* 1997; 105(8): 612-16
257. Rossetti MLR, Jardim SB, De FS Rodrigues V, Moura AR, Oliveira H, Zaha A. Improvement of *Mycobacterium tuberculosis* detection in clinical samples using DNA purified by glass matrix. *J Microbiol Methods* 1997; 28(2) : 139-146
258. Rossi MC, Gori A, Zehender G, Marchetti G, Ferrario G, De Maddalena C, Catozzi L, Bandera A, Esposti AD, Franzetti F. A PCR-colorimetric microwell plate hybridization assay for detection of *Mycobacterium tuberculosis* and *M. avium* from culture samples and Ziehl-Neelsen-positive smears. *J Clin Microbiol* 2000; 38(5): 1772-76
259. Ruiz M, Torres MJ, Llanos AC, Arroyo A, Palomares JC, Aznar J. Direct detection of rifampin and isoniazid-resistant *Mycobacterium tuberculosis* in auramine-rhodamine-positive sputum specimens by real-time PCR. *J Clin Microbiol* 2004; 42(4): 1585-9

260. Savic B, Sjobring U, Larsson L, Miorner H. Evaluation of polymerase chain reaction, tuberculostearic acid analysis, and direct microscopy for the detection of *Mycobacterium tuberculosis* in sputum. *J Infect Dis* 1992;166(5):1177-80
261. Schijman AG, Losso MH, Montoto M, Saez CB, Smayevsky J, Benetucci JA. Prospective evaluation of in-house polymerase chain reaction for diagnosis of mycobacterial diseases in patients with HIV infection and lung infiltrates. *Int J Tuberc Lung Dis* 2004; 8(1): 106-113
262. Schluger NW, Kinney D, Harkin TJ, Rom WN. Clinical utility of the polymerase chain reaction in the diagnosis of infections due to *Mycobacterium tuberculosis*. *Chest* 1994; 105(4): 1116-21
263. Sechi LA, Pinna MP, Sanna A, Pirina P, Ginesu F, Saba F, Aceti A, Turrini F, Zanetti S, Fadda G. Detection of *Mycobacterium tuberculosis* by PCR analysis of urine and other clinical samples from AIDS and non-HIV-infected patients. *Mol Cell Probes* 1997; 11(4): 281-85
264. Seethalakshmi S, Korath MP, Kareem F, Jagadeesan K. Detection of *Mycobacterium tuberculosis* by polymerase chain reaction in 301 biological samples--a comparative study. *J Assoc Physicians India* 1998; 46(9): 763-6
265. Shankar P, Manjunath N, Lakshmi R, Aditi B, Seth P, Shrinivas. Identification of *Mycobacterium tuberculosis* by polymerase chain reaction. *Lancet* 1990; 335(8686):423
266. Shawar RM, El-Zaatari FAK, Nataraj A, Clarridge JE. Detection of mycobacterium tuberculosis in clinical samples by two-step polymerase chain reaction and nonisotopic hybridization methods. *J Clin Microbiol* 1993; 31: 61-65
267. Shim JJ, Cheong HJ, Kang EY, In KH, Yoo SH, Kang KH. Nested polymerase chain reaction for detection of *Mycobacterium tuberculosis* in solitary pulmonary nodules. *Chest* 1998; 113(1): 20-4
268. Shim MS, Lee SY, Cho SH, Park YK, Bai GH, Kim SJ. Efficiency of different primers in polymerase chain reaction to detect *Mycobacterium tuberculosis* in clinical specimens. *J Kor Soc Microbiol* 1993; 28: 391-5
269. Shrestha NK, Tuohy MJ, Hall GS, Reischl U, Gordon SM, Procop GW. Detection and differentiation of *Mycobacterium tuberculosis* and nontuberculous mycobacterial isolates by real-time PCR. *J Clin Microbiol* 2003; 41(11):5121-6
270. Shrestha NK, Tuohy MJ, Hall GS, Reischl U, Gordon SM, Procop GW. Detection and differentiation of *Mycobacterium tuberculosis* and nontuberculous mycobacterial isolates by real-time PCR. *J Clin Microbiol* 2003; 41(11): 5121-6
271. Sjobring U, Mecklenburg M, Andersen AB, Miorner H. Polymerase chain reaction for detection of *Mycobacterium tuberculosis*. *J Clin Microbiol* 1990; 29: 2200-04
272. Skotnikova OI, Sobolev AY, Demkin VV, Nikolaeva NP, Nosova EY, Isaeva EL, Moroz AM, Litvinov VI. Application of nested-PCR technique for the diagnosis of tuberculosis. *Bull Exp Biol Med* 2000;129(6):612-4
273. Smith KC, Starke JR, Eisenach K, Ong LT, Denby M. Detection of *Mycobacterium tuberculosis* in clinical specimens from children using a polymerase chain reaction. *Pediatrics* 1996; 97(2): 155-60
274. Soini H, Skurnik M, Liippo K, Tala E, Viljanen MK. Detection and identification of mycobacteria by amplification of a segment of the gene coding for the 32-kilodalton protein. *J. Clin Microbiol* 1992; 30: 2025-28
275. Sperhake RD, Mello FC, Zaha A, Kritski A, Rossetti ML. Detection of *Mycobacterium tuberculosis* by a polymerase chain reaction colorimetric dot-blot assay. *Int J Tuberc Lung Dis* 2004; 8(3): 312-7
276. Sritharan V, Barker RH. A simple method for diagnosing *M. Tuberculosis* infection in clinical sample using PCR. *Mol Cell Probes* 1991; 5: 385-95
277. Su WJ, Tsou AP, Yang MH, Huang CY, Perng RP. Clinical experience in using polymerase chain reaction for rapid diagnosis of pulmonary tuberculosis. *Chin Med J (Taipei)* 2000; 63(7): 521-6
278. Taci N, Yurdakul AS, Ceyhan I, Berktaş MB, Ogretensoy M. Detection of *Mycobacterium tuberculosis* DNA from peripheral blood in patients with HIV-seronegative and new cases of smear-positive pulmonary tuberculosis by polymerase chain reaction. *Respir Med* 2003; 97(6): 676-81
279. Tan J, Lee BW, Lim TK, Chin NK, Tan CB, Xia JR, Yap HK, Kumarasinghe G. Detection of *Mycobacterium tuberculosis* in sputum, pleural and bronchoalveolar lavage fluid using DNA amplification of the MPB 64 protein coding gene and IS6110 insertion element. *Southeast Asian J Trop Med Public Health* 1995; 26(2): 247-52

280. Tan MF, Ng WC, Chan SH, Tan WC. Comparative usefulness of PCR in the detection of *Mycobacterium tuberculosis* in different clinical specimens. *J Med Microbiol* 1997; 46(2): 164-69
281. Tan YK, Lee AS, Khoo KL, Ong SY, Wong SY, Ong YY. Rapid mycobacterial tuberculosis detection in bronchoalveolar lavage samples by polymerase chain reaction in patients with upper lobe infiltrates and bronchiectasis. *Ann Acad Med Singapore* 1999; 28(2): 205-8
282. Tanaka II, Anno IS, Leite SR, Cooksey RC, Leite CQ. Comparison of a multiplex-PCR assay with mycolic acids analysis and conventional methods for the identification of mycobacteria. *Microbiol Immunol* 2003; 47(5): 307-12
283. Tang YW, Meng S, Li H, Stratton CW, Kayamatsu T, Zheng X. PCR enhances acid-fast bacillus stain-based rapid detection of *Mycobacterium tuberculosis*. *J Clin Microbiol* 2004; 42(4): 1849-50
284. Tansuphasiri U, Boonrat P, Rienthong S. Direct identification of *Mycobacterium tuberculosis* from sputum on Ziehl-Neelsen acid fast stained slides by use of silica-based filter combined with polymerase chain reaction assay. *J Med Assoc Thai* 2004; 87(2):180-9
285. Tansuphasiri U, Chinrat B, Rienthong S. Evaluation of culture and PCR-based assay for detection of *Mycobacterium tuberculosis* from sputum collected and stored on filter paper. *Southeast Asian J Trop Med Public Health* 2001; 32(4): 844-55
286. Tansuphasiri U. Detection of *Mycobacterium tuberculosis* from sputum collected on filter paper and stored at room temperature for 5 days by PCR assay and culture. *J Med Assoc Thai* 2001; 84(8): 1183-9
287. Thierry D, Brisson-Noel A, Vincent-Levy Frebault V, Nguyen S, Guesdon JL, Gicquel B. Characterization of a *Mycobacterium tuberculosis* insertion sequence, IS6110, and its application in diagnosis. *J Clin Microbiol* 1990; 28: 2668-73
288. Thierry D, Chureau C, Aznar C, Guesdon JL. The detection of *M.tuberculosis* in uncultured clinical specimens using the polymerase chain reaction and a non-radioactive probe. *Mol Cell Probes* 1992; 6: 181-91
289. Tiwari V, Jain A, Verma RK. Application of enzyme amplified mycobacterial DNA detection in the diagnosis of pulmonary & extra-pulmonary tuberculosis. *Indian J Med Res* 2003; 118:224-8
290. Torres MJ, Criado A, Ruiz M, Llanos AC, Palomares JC, Aznar J. Improved real-time PCR for rapid detection of rifampin and isoniazid resistance in *Mycobacterium tuberculosis* clinical isolates. *Diagn Microbiol Infect Dis* 2003; 45(3): 207-212
291. Totsch M, Schmid KW, Brommelkamp E, Stucker A, Puelacher C, Sidoroff G, Mikuz G, Bocker W, Dockhorn-Dworniczak B. Rapid detection of mycobacterial DNA in clinical samples by multiplex PCR. *Diagn Mol Pathol* 1994; 3(4): 260-4
292. Tumwasorn S, Kwanlertjit S, Mokmued S, Charoenlap P. Comparison of DNA targets for amplification by polymerase chain reaction for detection of *Mycobacterium tuberculosis* in sputum. *J Med Assoc Thai* 1996; 79 Suppl 1: S113-8
293. Vago L, Zerbi P, Caldarelli-Stefano R, Cannone M, D'Amico M, Bonetto S, Barberis M. Polymerase chain reaction for *Mycobacterium tuberculosis* complex DNA. Use on negative archival Ziehl-Neelsen cytologic samples. *Acta Cytol* 2000; 44(6): 1023-8
294. Van Doorn HR, Claas ECJ, Templeton KE, Van der Zanden AGM, Te Koppele Vije A, De Jong MD, Dankert J, Kuijper EJ. Detection of a point mutation associated with high-level isoniazid resistance in *Mycobacterium tuberculosis* by using real-time PCR technology with 3'-minor groove binder-DNA probes. *J Clin Microbiol* 2003; 41(10): 4630-35
295. Van Helden PD, Du Toit R, Jordaan A, Taljaard B, Pitout J, Victor T. The use of the Polymerase Chain reaction test in the diagnosis of tuberculosis. *South African Med J* 1991; 80: 515-16
296. Veringa E, Van Harselaar B, Hermans P. Polymerase chain reaction to detect *Mycobacterium tuberculosis* in a clinical microbiology laboratory. *J Microbiol Methods* 1993; 17(2): 165
297. Verma A, Rattan A, Tyagi JS. Development of a 23S rRNA-based PCR assay for the detection of mycobacteria. *Indian J Biochem Biophys* 1994; 31(4): 288-94
298. Victor T, Du Toit R, Van Helden PD. Purification of sputum samples through sucrose improves detection of *Mycobacterium tuberculosis* by polymerase chain reaction. *J Clin Microbiol* 1992; 30: 1514-17
299. Walker DA, Taylor IK, Mitchell DM, Shaw RJ. Comparison of polymerase chain reaction amplification of two mycobacterial DNA sequences, IS6110 and the 65kDa antigen gene in the diagnosis of tuberculosis. *Thorax* 1992; 47: 690-94

300. Wang SW, Hsieh SC, Ding MJ. Rapid detection of *Mycobacterium tuberculosis* in various clinical specimens by using polymerase chain reaction combined with a nonradioactive hybridization system. *Chin J Microbiol Immunol* 1997; 30(3): 160-69
301. Watterson SA, Wilson SM, Yates MD, Drobniowski FA. Comparison of three molecular assays for rapid detection of rifampin resistance in *Mycobacterium tuberculosis*. *J Clin Microbiol* 1998; 36(7): 1969-73
302. Weekes KM, Pearse MJ, Sievers A, Ross BC, d'Apice AJ. The diagnostic use of the polymerase chain reaction for the detection of *Mycobacterium tuberculosis*. *Pathology* 1994; 26(4): 482-86
303. Wilson SM, McNerney R, Nye PM, Godfrey-Faussett PD, Stoker NG, Voller A. Progress toward a simplified polymerase chain reaction and its application to diagnosis of tuberculosis. *J Clin Microbiol* 1993; 31: 776-82
304. Wilson SM, Nava E, Morales A, Godfrey-Faussett P, Gillespie S, Andersson N. Simplification of the polymerase chain reaction for detection of *Mycobacterium tuberculosis* in the tropics. *Trans R Soc Trop Med Hyg* 1993; 87(2): 177-80
305. Wong CF, Yew WW, Chan CY, Au LY, Cheung SW, Cheng AF. Rapid diagnosis of smear-negative pulmonary tuberculosis via fiberoptic bronchoscopy: utility of polymerase chain reaction in bronchial aspirates as an adjunct to transbronchial biopsies. *Respir Med* 1998; 92(6):815-19
306. Yoon KH, Cho SN, Lee TY, Cheon SH, Chang J, Kim SK, Chong Y, Chung DH, Lee WY, Kim JD. Detection of *Mycobacterium tuberculosis* in clinical samples from patients with tuberculosis or other pulmonary diseases by polymerase chain reaction. *Yonsei Med J* 1992; 33(3): 209-16
307. Yuen KY, Chan KS, Chan CM, Ho BS, Dai LK, Chau PY, Ng MH. Use of PCR in routine diagnosis of treated and untreated pulmonary tuberculosis. *J Clin Pathol* 1993; 46(4): 318-22
308. Yuen KY, Chan KS, Chan CM, Ho PL, Ng MH. Monitoring the therapy of pulmonary tuberculosis by nested polymerase chain reaction assay. *J Infect* 1997; 34(1): 29-33
309. Zambardi G, Druetta A, Roure C, Fouqué B, Girardo P, Chypre C, Marchand J, Freney J, Fleurette J. Rapid diagnosis of *Mycobacterium tuberculosis* infections by an ELISA-like detection of polymerase chain reaction products. *Mol Cell Probes* 1995; 9: 91-99
310. Zhou AT, Ma WL, Zhang PY, Cole RA. Detection of pulmonary and extrapulmonary tuberculosis patients with the 38-kilodalton antigen from *Mycobacterium tuberculosis* in a rapid membrane-based assay. *Clin Diagn Lab Immunol* 1996; 3(3): 337-41
311. An Q, Buxton D, Hendricks A, Robinson L, Shah J, Lu L, Vera-Garcia M, King W, Olive M. Comparison of amplified Q-replicase and PCR assays for detection of *Mycobacterium tuberculosis*. *J Clin Microbiol* 1995; 33: 860-867
312. Bergmann JS, Woods GL. Clinical evaluation of the BDProbeTec strand displacement amplification assay for rapid diagnosis of tuberculosis. *J Clin Microbiol* 1998;36(9):2766-68
313. Bodmer T., A. Gurtner, K. Schopfer, Matter L. Screening of respiratory tract specimens for the presence of *Mycobacterium tuberculosis* by using the Gen-Probe Amplified *Mycobacterium Tuberculosis* Direct Test. *J Clin Microbiol* 1994; 32: 1483-87
314. Bradley SP, Reed SL, Catanzaro A. Clinical efficacy of the amplified *Mycobacterium tuberculosis* direct test for the diagnosis of pulmonary tuberculosis. *Am J Respir Crit Care Med*. 1996; 153(5):1606-10
315. Down JA, O'Connell MA, Dey MS, Walters AH, Howard DR, Little MC, Keating WE, Zwadyk P Jr, Haaland PD, McLaurin DA 3rd, Cole G. Detection of *Mycobacterium tuberculosis* in respiratory specimens by strand displacement amplification of DNA. *J Clin Microbiol* 1996; 34(4): 860-65
316. Fairfax MR. Evaluation of the Gen-Probe Amplified *M. tuberculosis* direct detection Test. *Am J Clin Pathol* 1996; 106: 594-99
317. Gamboa F, Manterola JM, Lonca J, Vinado B, Matas L, Gimenez M, Manzano JR, Rodrigo C, Cardona PJ, Padilla E, Dominguez J, Ausina V. Rapid detection of *Mycobacterium tuberculosis* in respiratory specimens, blood and other non-respiratory specimens by amplification of rRNA. *Int J Tuberc Lung Dis* 1997;1(6):542-55
318. Hoffner SE, Cristea M, Klintz L, Petrini B, Kallenius G. RNA amplification for direct detection of *Mycobacterium tuberculosis* in respiratory samples. *Scand J Infect Dis* 1996; 28(1): 59-61
319. Hoffner SE, Norberg R, Carlos Toro J, Winqvist N, Koivula T, Dias F, Svenson SB, Kallenius G. Direct detection of *Mycobacterium tuberculosis* in sputum samples from Guinea Bissau by an rRNA target-amplified test system. *Tuber Lung Dis* 1996; 77(1): 67-70

320. Jonas V, Alden MJ, Curry JI, Kamisango K, Knott CA, Landford R, Wolfe JM, Moore DF. Detection and identification of *Mycobacterium tuberculosis* directly from sputum sediments by amplification of rRNA. *J Clin Microbiol* 1993; 31: 2410-16
321. Jorgensen JH, Salinas JR, Paxson R, Magnon K, Patterson JE, Patterson TF. False-positive Gen-Probe direct *Mycobacterium tuberculosis* amplification test results for patients with pulmonary *M. kansasii* and *M. avium* infections. *J Clin Microbiol* 1999; 37(1): 175-78
322. La Rocco MT, Wanger A, Ocera H, Macias E. Evaluation of a commercial rRNA amplification assay for direct detection of *Mycobacterium tuberculosis* in processed sputum. *Eur J Clin Microbiol Infect Dis* 1994; 13: 726-31
323. Manterola JM, Gamboa F, Ionca J, Matas L, Ruiz Manzano J, Rodrigo C, Ausina V. Inhibitory effect of sodium dodecyl sulphate in detection of *Mycobacterium tuberculosis* by amplification of rRNA. *J Clin Microbiol* 1995; 33 (12): 3338-40
324. Miller N, Hernandez SG, Cleary TJ. Evaluation of Gen-Probe Amplified *Mycobacterium Tuberculosis* Direct Test and PCR for direct detection of *Mycobacterium tuberculosis* in clinical specimens. *J Clin Microbiol* 1994; 32(2): 393-97
325. Pfyffer GE, Funke-Kissling P, Runder E, Weber R. Performance characteristics of the BDProbeTec system for direct detection of *Mycobacterium tuberculosis* complex in respiratory specimens. *J Clin Microbiol* 1999; 37(1):137-40
326. Pfyffer GE, Kissling P, Jahn EM, Welscher HM, Salfinger M, Weber R. Diagnostic performance of amplified *Mycobacterium tuberculosis* direct test with cerebrospinal fluid, other nonrespiratory, and respiratory specimens. *J Clin Microbiol* 1996; 34(4): 834-41
327. Pfyffer, GE, Kissling P, Wirth R, Weber R. Direct detection of *Mycobacterium tuberculosis* complex in respiratory specimens by a target-amplified test system. *J Clin Microbiol* 1994; 32: 918-23
328. Portaels F, Serruys E, De Beenhouwer H, Degraux J, De Ridder K, Fissette K, Gomez-Marin J, Goossens H, Muhlberger F, Pattyn SR, Nturanye F, Pouthier F, Van Deun A. Evaluation of the Gen-Probe amplified *Mycobacterium tuberculosis* direct test for the routine diagnosis of pulmonary tuberculosis. *Acta Clin Belg* 1996;51(3):144-49
329. Putova I, Havelkova M, Svandova E. Application of the Gen-Probe amplified MTD test (*Mycobacterium tuberculosis* Direct Test) in the diagnostics of tuberculosis. *Cent Eur J Public Health* 1996;4(2):91-5
330. Shah SJ, Liu J, Buxton D, Hendricks A, Robinson L., Radcliffe G, King W, Lane D, Olive DM, Klinger JD. Q-Beta Replicase-Amplified Assay for detection of *Mycobacterium tuberculosis* directly from clinical specimens. *J Clin Microbiol* 1995; 33: 1435-41
331. Smith JH, Buxton D, Cahill P, Fiandaca M, Goldston L, Marselle L, Rigby S, Olive DM, Hendricks A, Shimei T, Klinger JD, Lane DJ, Mahan DE. Detection of *Mycobacterium tuberculosis* directly from sputum by using a prototype automated Q-beta replicase assay. *J Clin Microbiol* 1997; 35(6): 1477-83
332. Smith JH, Radcliffe G, Rigby S, Mahan D, Lane DJ, Klinger JD. Performance of an automated Q-beta replicase amplification assay for *M.tuberculosis* in a clinical trial. *J Clin Microbiol* 1997; 35: 1484-91
333. Thomsen VO. Diagnosis of pulmonary tuberculosis. Application of gen-probe amplified *Mycobacterium tuberculosis* direct test. *APMIS* 1998; 106(7): 699-703
334. Vlaspolder, Singer and Roggeveen. Diagnostic value of an amplification method (Gen-Probe) compared with that of culture for diagnosis of tuberculosis. *J Clin Microbiol* 1995; 33: 2699-703
335. Welch K, Brown G, Jonas V, Ferraro MJ. Performance of the Gen-Probe amplified *Mycobacterium tuberculosis* direct test in a laboratory that infrequently isolates *Mycobacterium tuberculosis*. *Diagn Microbiol Infect Dis* 1995; 22(3): 297-9
336. Alonso P, Orduna A, Bratos MA, San Miguel A, Rodriguez Torres A. Clinical evaluation of a commercial ligase-based gene amplification method for detection of *Mycobacterium tuberculosis*. *Eur J Clin Microbiol Infect Dis* 1998; 17(6): 371-76
337. Carpentier E, Drouillard B, Dailloux M, Moinard D, Vallee E, Dutilh B, Maugein J, Bergogne-Berezin E, Carbonnelle B. Diagnosis of tuberculosis by Amplicor *Mycobacterium tuberculosis* test: a multicenter study. *J Clin Microbiol* 1995; 33(12): 3106-10
338. Conaty SJ, Claxton AP, Enoch DA, Hayward AC, Lipman MC, Gillespie SH. The interpretation of nucleic acid amplification tests for tuberculosis: do rapid tests change treatment decisions? *J Infect* 2005; 50(3): 187-92

339. Eing BR, Becker A, Sohns A, Ringelmann R. Comparison of Roche Cobas Amplicor Mycobacterium tuberculosis assay with in-house PCR and culture for detection of M. tuberculosis. *J Clin Microbiol* 1998; 36(7): 2023-29
340. Lindbrathen A, Gaustad P, Hovig B, Tonjum T. Direct detection of Mycobacterium tuberculosis complex in clinical samples from patients in Norway by ligase chain reaction. *J Clin Microbiol* 1997; 35(12): 3248-53
341. Oh EJ, Park YJ, Chang CL, Kim BK, Kim SM. Improved detection and differentiation of mycobacteria with combination of Mycobacterium Growth Indicator Tube and Roche COBAS AMPLICOR System in conjunction with Duplex PCR. *J Microbiol Methods*. 2001; 46(1): 29-36
342. Se Thoe SY, Tay L, Sng EH. Evaluation of Amplicor- and IS6110-PCR for direct detection of Mycobacterium tuberculosis complex in Singapore. *Trop Med Int Health* 1997; 2(11): 1095-101
343. Shah S, Miller A, Mastellone A, Kim K, Colaninno P, Hochstein L, D'Amato R. Rapid diagnosis of tuberculosis in various biopsy and body fluid specimens by the AMPLICOR Mycobacterium tuberculosis polymerase chain reaction test. *Chest* 1998; 113(5): 1190-94
344. Shetty N, Shemko M, Holton J, Scott GM. Is the detection of Mycobacterium tuberculosis DNA by ligase chain reaction worth the cost: experiences from an inner London teaching hospital. *J Clin Pathol* 2000; 53(12): 924-28
345. Shibuya Y, Shiozaki T, Hayashi M, Sugiyama Y. Efficacy of Amplicor PCR for the diagnosis of tuberculosis in respiratory specimens other than sputum. *Tuber Lung Dis* 2000; 80(4-5): 209-15
346. Stauffer F, Haber H, Rieger A, Mutschlechner R, Hasenberger P, Tevere VJ, Young KK. Genus level identification of mycobacteria from clinical specimens by using an easy-to-handle Mycobacterium-specific PCR assay. *J Clin Microbiol* 1998; 36(3): 614-17
347. Visca P, De Mori P, Festa A, Montrone ML, Amicosante M, Pucillo LP. Evaluation of the BDProbeTec strand displacement amplification assay in comparison with the AMTD II direct test for rapid diagnosis of tuberculosis. *Clin Microbiol Infect* 2004; 10(4): 332-4
348. Wiener RS, Della-Latta P, Schluger NW. Effect of nucleic acid amplification for Mycobacterium tuberculosis on clinical decision making in suspected extrapulmonary tuberculosis. *Chest*. 2005; 128(1): 102-7
349. Wobeser WL, Kraiden M, Conly J, Simpson H, Yim B, D'costa M, Fuksa M, Hian-Cheong C, Patterson M, Phillips A, Bannatyne R, Haddad A, Brunton JL, Kraiden S. Evaluation of Roche Amplicor PCR assay for Mycobacterium tuberculosis. *J Clin Microbiol* 1996; 34(1): 134-39
350. Yam WC, Cheng VC, Hui WT, Wang LN, Seto WH, Yuen KY. Direct detection of Mycobacterium tuberculosis in clinical specimens using single-tube biotinylated nested polymerase chain reaction-enzyme linked immunoassay (PCR-ELISA). *Diagn Microbiol Infect Dis* 2004; 48(4): 271-5
351. Delacourt C, Poveda JD, Chureau C, Beydon N, Mahut B, de Blic J, Scheinmann P, Garrigue G. Use of polymerase chain reaction for improved diagnosis of tuberculosis in children. *J Pediatr* 1995; 126(5 Pt 1): 703-9
352. Devallois A, Legrand E, Rastogi N. Evaluation of Amplicor MTB test as adjunct to smears and culture for direct detection of Mycobacterium tuberculosis in the French Caribbean. *J Clin Microbiol* 1996;34(5):1065-8
353. Gomez-Pastrana D, Torronteras R, Caro P, Anguita ML, Lopez-Barrio AM, Andrei A, Navarro J. Comparison of Amplicor, in-house polymerase chain reaction and conventional culture for the diagnosis of tuberculosis in children. *Clin Infect Dis* 2001; 32(1): 17-22
354. Jouveshomme S, Cambau E, Trystram D, Szpytma M, Sougakoff W, Derenne JP, Grosset J. Clinical utility of an amplification test based on ligase chain reaction in pulmonary tuberculosis. *Am J Respir Crit Care Med* 1998; 158(4): 1096-101
355. Neu N, Saiman L, San Gabriel P, Whittier S, Knirsch C, Ruzal-Shapiro C, Della-Latta P. - Diagnosis of pediatric tuberculosis in the modern era. *Pediatr Infect Dis J* 1999; 18(2): 122-26
356. Pierre C, Olivier C, Lecossier D, Boussougant Y, Yeni P, Hance AJ. Diagnosis of primary tuberculosis in children by amplification and detection of mycobacterial DNA. *Am Rev Respir Dis* 1993; 147(2): 420-4
357. Piersimoni C, Zitti P, Cimarelli ME, Nista D, De Sio G. Clinical utility of the Gen-Probe amplified Mycobacterium tuberculosis direct test compared with smear and culture for the diagnosis of pulmonary tuberculosis. *Clin Microbiol Infect* 1998; 4: 442-446
358. Moore DF, Curry JI, Knott CA, Jonas VI. Amplification of rRNA for assessment of treatment response of pulmonary tuberculosis patients during antimicrobial therapy. *J Clin Microbiol* 1996; 34: 1745-49



359. Rajalahti I, Vuorinen P, Liippo K, Nieminen MM, Miettinen A. Evaluation of commercial DNA and rRNA amplification assays for assessment of treatment outcome in pulmonary tuberculosis patients. *Eur J Clin Microbiol Infect Dis* 2001; 20(10): 746-50
360. Yajko DM, Wagner C, Tevere VJ, Kocagoz T, Hadley WK, Chambers HF. Quantitative culture of *Mycobacterium tuberculosis* from clinical sputum specimens and dilution endpoint of its detection by the Amplicor PCR assay. *J Clin Microbiol* 1995; 33(7): 1944-47
361. Dowdy DW, Maters A, Parrish N, Beyrer C, Dorman SE. Cost-effectiveness analysis of the gen-probe amplified mycobacterium tuberculosis direct test as used routinely on smear-positive respiratory specimens. *J Clin Microbiol* 2003; 41(3): 948-53
362. Lim TK, Cherian J, Poh KL, Leong TY. The rapid diagnosis of smear-negative pulmonary tuberculosis: a cost-effectiveness analysis. *Respirology* 2000; 5(4): 403-9
363. Maekura R, Kohno H, Hirotsu A, Okuda Y, Ito M, Ogura T, Yano I. Prospective clinical evaluation of the serologic tuberculous glycolipid test in combination with the nucleic acid amplification test. *J Clin Microbiol* 2003; 41(3): 1322-25
364. Mitarai S, Kurashima A, Tamura A, Nagai H, Shishido H. Clinical evaluation of Amplicor *Mycobacterium* detection system for the diagnosis of pulmonary mycobacterial infection using sputum. *Tuberculosis (Edinb)* 2001; 81(5-6): 319-25
365. Ridderhof JC, Williams LO, Legois S, Shult PA, Metchock B, Kubista LN, Handsfield JH, Fehd RJ, Robinson PH. Assessment of Laboratory Performance of Nucleic Acid Amplification Tests for Detection of *Mycobacterium tuberculosis*. *J Clin Microbiol* 2003; 41(11): 5258-61
366. Sarmiento OL, Weigle KA, Alexander J, Weber DJ, Miller WC. Assessment by meta-analysis of PCR for diagnosis of smear-negative pulmonary tuberculosis. *J Clin Microbiol* 2003; 41(7): 3233-40
367. Shim TS, Chi HS, Lee SD, Koh Y, Kim WS, Kim DS, Kim WD. Adequately washed bronchoscope does not induce false positive amplification tests on bronchial aspirates in the diagnosis of tuberculosis. *Chest* 2002; 121: 774-781
368. Sloutsky A, Han LL, Werner BG. New method for detection of *Mycobacterium tuberculosis* Direct Test inhibitors in clinical specimens. *Diagn Microbiol Infect Dis* 2004;50:109-11
369. Abu-Amero KK. Potential for the use of Polymerase Chain Reaction (PCR) in the detection and identification of *Mycobacterium tuberculosis* complex in sputum samples. *Mol Biol Today* 2002; 3(2): 39-42
370. Al Zahrani K, Al Jahdali H, Poirier L, Rene P, Gennaro ML, Menzies D. Accuracy and utility of commercially available amplification and serologic tests for the diagnosis of minimal pulmonary tuberculosis. *Am J Respir Crit Care Med* 2000;162: 1323-29
371. Al Zahrani K, Al Jahdali H, Poirier L, Rene P, Menzies D. Yield of smear, culture and amplification tests from repeated sputum induction for the diagnosis of pulmonary tuberculosis. *Int J Tuberc Lung Dis* 2001; 5 (9) : 855-860
372. Boddingtonhaus B, Wichelhaus TA, Brade V, Bittner T. Removal of PCR inhibitors by silica membranes: evaluating the Amplicor *Mycobacterium tuberculosis* kit. *J Clin Microbiol* 2001; 39(10): 3750-2
373. Bodmer T, Gurtner A, Scholkmann M, Matter L. Evaluation of the COBAS AMPLICOR MTB system. *J Clin Microbiol* 1997; 35(6): 1604-05
374. Brown TJ, Power EG, French GL. Evaluation of three commercial detection systems for *Mycobacterium tuberculosis* where clinical diagnosis is difficult. *J Clin Pathol* 1999; 52(3): 193-7
375. Burggraf S, Reischl U, Malik N, Bollwein M, Naumann L, Olgemoller B. Comparison of an internally controlled, large-volume LightCycler assay for detection of *Mycobacterium tuberculosis* in clinical samples with the COBAS AMPLICOR assay. *J Clin Microbiol* 2005; 43(4): 1564-9
376. Catanzaro A, Perry S, Clarridge JE, Dunbar S, Goodnight-White S, LoBue PA, Peter C, Pfyffer GE, Sierra MF, Weber R, Woods G, Mathews G, Jonas V, Smith K, Della-Latta P. The role of clinical suspicion in evaluating a new diagnostic test for active tuberculosis: results of a multicenter prospective trial. *JAMA* 2000; 283(5): 639-45
377. Chin DP, Yajko DM, Hadley WK, Sanders CA, Nassos PS, Madej JJ, Hopewell PC. Clinical utility of a commercial test based on the polymerase chain reaction for detecting *Mycobacterium tuberculosis* in respiratory specimens. *Am J Respir Crit Care Med* 1995; 151(6): 1872-77

378. Della-Latta P, Whittier S. Comprehensive evaluation of performance, laboratory application, and clinical usefulness of two direct amplification technologies for the detection of *Mycobacterium tuberculosis* complex. *Am J Clin Pathol* 1998; 110(3): 301-10
379. Drosten C, Panning M, Kramme S. Detection of *Mycobacterium tuberculosis* by real-time PCR using pan-mycobacterial primers and a pair of fluorescence resonance energy transfer probes specific for the *M. tuberculosis* complex. *Clin Chem* 2003; 49(10): 1659-61
380. Ehlers S, Pirmann M, Zaki W, Hahn H. Evaluation of a commercial rRNA target amplification assay for detection of *Mycobacterium tuberculosis* complex in respiratory specimens. *Eur J Clin Microbiol Infect Dis* 1994; 13(10): 827-9
381. Fadda G, Ardito F, Sanguinetti M, Posteraro B, Ortona L, Chezzi C, Polonelli L, Dettori G, Conti S, Fanti F, Galli C. Evaluation of the Abbott LCx *Mycobacterium tuberculosis* assay in comparison with culture methods in selected Italian patients. *New Microbiol* 1998; 21(2): 97-103
382. Garrino MG, Glupczynski Y, Degraux J, Nized H, Delmee M. Evaluation of the Abbott LCx *Mycobacterium tuberculosis* assay for direct detection of *Mycobacterium tuberculosis* complex in human samples. *J Clin Microbiol* 1999; 37(1): 229-32
383. Goessens WH, de Man P, Koeleman JG, Luijendijk A, te Witt R, Endtz HP, van Belkum A. Comparison of the COBAS AMPLICOR MTB and BDProbeTec ET assays for detection of *Mycobacterium tuberculosis* in respiratory specimens. *J Clin Microbiol* 2005; 43(6): 2563-6
384. Huang TS, Huang WK, Lee SS, Tu HZ, Chang SH, Liu YC. Rapid detection of pulmonary tuberculosis using the BDProbeTEC ET *Mycobacterium tuberculosis* Complex Direct Detection Assay (DTB). *Diagn Microbiol Infect Dis* 2003; 46(1): 29-33
385. Huang TS, Liu YC, Lin HH, Huang WK, Cheng DL. Comparison of the Roche AMPLICOR MYCOBACTERIUM assay and Digene SHARP Signal System with in-house PCR and culture for detection of *Mycobacterium tuberculosis* in respiratory specimens. *J Clin Microbiol* 1996; 34(12): 3092-96
386. Ichiyama S, Ito Y, Sugiura F, Iinuma Y, Yamori S, Shimojima M, Hasegawa Y, Shimokata K, Nakashima N. Diagnostic value of the strand displacement amplification method compared to those of Roche Amplicor PCR and culture for detecting mycobacteria in sputum samples. *J Clin Microbiol* 1997; 35(12): 3082-85
387. Jackson KM, Edwards RM, Bowden DS, Leslie DE. Evaluation of the Roche Amplicor polymerase chain reaction system for detection of *Mycobacterium tuberculosis* complex in specimens. *Pathology* 1996; 28(1): 65-7
388. Jungkind D, Drenzo S, Beavis KG, Silverman NS. Evaluation of automated COBAS AMPLICOR PCR system for detection of several infectious agents and its impact on laboratory management. *J Clin Microbiol* 1996; 34(11): 2778-83
389. Kambashi B; Mbulo G; McNerney R; Tembwe R; Kambashi A; Tuhon V; Godfrey-Faussett P Zambart. Utility of nucleic acid amplification technique for the diagnosis of pulmonary tuberculosis in Sub-Saharan Africa. *Int J Tuberc Lung Dis* 2001; 5(4): 364-69
390. Kaul KL. Molecular detection of *Mycobacterium tuberculosis*: impact on patient care. *Clin Chem* 2001; 47(8): 1553-8
391. Kerleguer A, Koeck JL, Fabre M, Gerome P, Teyssou R, Herve V. Use of equivocal zone in interpretation of results of the amplified mycobacterium tuberculosis direct test for diagnosis of tuberculosis. *J Clin Microbiol* 2003; 41(4): 1783-4
392. Kivihya-Ndugga L, van Cleeff M, Juma E, Kimwomi J, Githui W, Oskam L, Schuitema A, van Soolingen D, Nganga L, Kibuga D, Odhiambo J, Klatser P. Comparison of PCR with the routine procedure for diagnosis of tuberculosis in a population with high prevalences of tuberculosis and human immunodeficiency virus. *J Clin Microbiol* 2004; 42(3):1012-5
393. Middleton AM, Cullinan P, Wilson R, Kerr JR, Chadwick MV. Interpreting the results of the amplified *Mycobacterium tuberculosis* direct test for detection of *M. tuberculosis* rRNA. *J Clin Microbiol* 2003; 41(6): 2741-3
394. Moore DF, Guzman JA, Mikhail LT. Reduction in turnaround time for laboratory diagnosis of pulmonary tuberculosis by routine use of a nucleic acid amplification test. *Diagn Microbiol Infect Dis* 2005; 52(3): 247-54
395. O'Connor TM, Sheehan S, Cryan B, Brennan N, Bredin CP. The ligase chain reaction as a primary screening tool for the detection of culture positive tuberculosis. *Thorax* 2000; 55(11): 955-57

396. Rajalahti I, Vuorinen P, Nieminem MM, Miettinen A. Detection of Mycobacterium tuberculosis complex in sputum specimens by the automated Roche Cobas Amplicor Mycobacterium tuberculosis test. *J Clin Microbiol* 1998; 36(4): 975-78
397. Rantakokko-Jalava K, Marjamaki M, Marttila H, Makela L, Valtonen V, Viljanen MK. LCx Mycobacterium tuberculosis assay is valuable with respiratory specimens, but provides little help in the diagnosis of extrapulmonary tuberculosis. *Ann Med* 2001; 33(1): 55-62
398. Ribeiro FK, Dettoni Vdo V, Peres RL, Vinhas SA, Co TR, Dietze R, Palaci M. Evaluation of a commercial test based on ligase chain reaction for direct detection of Mycobacterium tuberculosis in respiratory specimens. *Rev Soc Bras Med Trop* 2004; 37(6): 431-5
399. Ruiz-Serrano MJ, Albadalejo J, Martinez-Sanchez L, Bouza E. LCx: a diagnostic alternative for the early detection of Mycobacterium tuberculosis complex. *Diagn Microbiol Infect Dis* 1998; 32(4): 259-64
400. Salajka F, Mezensky L, Pokorny A. Commercial polymerase chain reaction test (Amplicor set) in the diagnosis of smear-negative pulmonary tuberculosis from sputum and bronchoalveolar lavage. *Monaldi Arch Chest Dis* 2000; 55(1): 9-12
401. Schirm J, Oostendorp LAB, Mulder JG. Comparison of Amplicor, in-house PCR and conventional culture for detection of Mycobacterium tuberculosis in clinical samples. *J Clin Microbiol* 1995; 33: 3221-24
402. Sloutsky A, Han LL, Werner BG. Practical strategies for performance optimization of the enhanced gen-probe amplified mycobacterium tuberculosis direct test. *J Clin Microbiol* 2004; 42(4): 1547-51
403. Stauffer F, Mutschlechner R, Hasenberger P, Stadlbauer S, Schinko H. Detection of Mycobacterium tuberculosis complex in clinical specimens by a commercial polymerase chain reaction kit. *Eur J Clin Microbiol Infect Dis* 1995; 14(12): 1046-51
404. Tonjum T, Klintz L, Bergan T, Baann J, Furuberg G, Cristea M, Petrini B, Hoffner S. Direct detection of Mycobacterium tuberculosis in respiratory samples from patients in Scandinavia by polymerase chain reaction. *Clin Microbiol Infect* 1996; 2(2): 127-31
405. Tortoli E, Lavinia F, Simonetti MT. Evaluation of a commercial ligase chain reaction kit (Abbott LCx) for direct detection of Mycobacterium tuberculosis in pulmonary and extrapulmonary specimens. *J Clin Microbiol* 1997; 35(9): 2424-26
406. Tortoli E, Tronci M, Tosi CP, Galli C, Lavinia F, Natili S, Goglio A. Multicentre evaluation of two commercial amplification kits (Amplicor, Roche and LCx, Abbott) for direct detection of Mycobacterium tuberculosis in pulmonary and extrapulmonary specimens. *Diagn Microbiol Infect Dis* 1999; 33: 173-79
407. Yam WC, Tam CM, Leung CC, Tong HL, Chan KH, Leung ETY, Wong KC, Yew WW, Seto WH, Yuen KY, Ho PL. Direct detection of rifampin resistance Mycobacterium tuberculosis in respiratory by PCR-DNA sequencing. *J Clin Microbiol* 2004; 42: 4438-43
408. D'Amato RF, Miller A. Rapid diagnosis of pulmonary tuberculosis using Roche AMPLICOR Mycobacterium tuberculosis PCR test. *Methods Mol Biol*. 1998; 92: 203-14
409. Hengstler M, Klavehn P, Glockner G, Fahr AM. Evaluation of the Amplicor(TM) Mycobacterium tuberculosis amplification and detection kit in a clinical laboratory: Results and experiences. *Klinisches Labor* 1996; 42(5): 387-393
410. Iinuma Y, Ichiyama S, Yamori S, Oohama J, Takagi N, Hasegawa Y, Shimokata K, Nakashima N. Diagnostic value of the Amplicor PCR assay for initial diagnosis and assessment of treatment response for pulmonary tuberculosis. *Microbiol Immunol* 1998; 42: 281-87
411. Cohen RA, Muzaffar S, Schwartz D, Bashir S, Luke S, McGartland LP, Kaul K. Diagnosis of pulmonary tuberculosis using PCR assays on sputum collected within 24 hours of hospital admission. *Am J Respir Crit Care Med* 1998; 157(1): 156-61
412. Kwiatkowska S, Marczak J, Zieba M, Nowak D. Clinical utility of a commercial ligase chain reaction kit for the diagnosis of smear-negative pulmonary tuberculosis. *Int J Tuberc Lung Dis* 1999;3(5):421-5
413. Lim TK, Gough A, Chin NK, Kumarasinghe G. Relationship between estimated pretest probability and accuracy of automated Mycobacterium tuberculosis assay in smear-negative pulmonary tuberculosis. *Chest* 2000; 118(3): 641-47
414. Lim TK, Mukhopadhyay A, Gough A, Khoo KL, Khoo SM, Lee KH, Kumarasinghe G. Role of clinical judgment in the application of a nucleic acid amplification test for the rapid diagnosis of pulmonary tuberculosis. *Chest* 2003; 124(3): 902-8

415. Lim TK, Zhu D, Gough A, Lee KH, Kumarasinghe G. What is the optimal approach for using a direct amplification test in the routine diagnosis of pulmonary tuberculosis? A preliminary assessment. *Respirology* 2002; 7(4): 351-7
416. Van den Wijngaert S, Dediste A, VanLaethem Y, Gerard M, Vandenberg O, Zissis G. Critical use of nucleic acid amplification techniques to test for *Mycobacterium tuberculosis* in respiratory tract samples. *J Clin Microbiol* 2004; 42(2):837-8
417. Alcalá L, Ruiz-Serrano MJ, Hernangomez S, Marin M, de Viedma DG, San Juan R, Bouza E. Evaluation of the upgraded amplified *Mycobacterium tuberculosis* direct test (Gen-Probe) for direct detection of *Mycobacterium tuberculosis* in respiratory and non-respiratory specimens. *Diagn Microbiol Infect Dis* 2001; 41(1-2): 51-6
418. Ausina V, Gamboa F, Gazapo E, Manterola JM, Lonca J, Matas L, Manzano JR, Rodrigo C, Cardona PJ, Padilla E. Evaluation of the semiautomated AbbotLCX *Mycobacterium tuberculosis* assay for direct detection of *Mycobacterium tuberculosis* in respiratory specimens. *J Clin Microbiol* 1997; 35: 1996-2002
419. Barrett A, Magee JG, Freeman R. An evaluation of the BDProbeTec ET system for the direct detection of *Mycobacterium tuberculosis* in respiratory samples. *J Med Microbiol* 2002; 51(10): 895-8
420. Beavis KG, Lichty MB, Jungking DL, Giger O. Evaluation of AMPLICOR PCR for direct detection of *Mycobacterium tuberculosis* from sputum specimens. *J Clin Microbiol* 1995; 33:2582-86
421. Bennedsen J, Thomsen VO, Pfyffer GE, Funke G, Feldmann K, Beneke A, Jenkins PA, Hegginbothom M, Fahr A, Hengstler M, Cleator G, Klapper P, Wilkins EG. Utility of PCR in diagnosing pulmonary tuberculosis. *J Clin Microbiol* 1996; 34(6): 1407-11
422. Bergmann JS, Keating WE, Woods GL. Clinical evaluation of the BDProbeTec ET system for rapid detection of *Mycobacterium tuberculosis*. *J Clin Microbiol* 2000; 38(2): 863-5
423. Bergmann JS, Woods GL. Clinical evaluation of the Roche AMPLICOR PCR *Mycobacterium tuberculosis* test for detection of *M. tuberculosis* in respiratory specimens. *J Clin Microbiol* 1996; 34(5): 1083-85
424. Bergmann JS, Yuoh G, Fish G, Woods GL. Clinical evaluation of the enhanced Gen-Probe Amplified *Mycobacterium tuberculosis* Direct Test for rapid diagnosis of tuberculosis in prison inmates. *J Clin Microbiol* 1999; 37: 1419-25
425. Bodmer T, Mockl E, Muhlemann K, Matter L. Improved performance of Gen-Probe Amplified *Mycobacterium Tuberculosis* Direct Test when 500 instead of 50 microliters of decontaminated sediment is used. *J Clin Microbiol* 1996; 34(1): 222-23
426. Bogard M, Vincelette J, Antinozzi R, Alonso R, Fenner T, Schirm J, Aubert D, Gaudreau C, Sala E, Ruiz-Serrano MJ, Petersen H, Oostendorp LA, Burkardt H. Multicenter study of a commercial, automated polymerase chain reaction system for the rapid detection of *Mycobacterium tuberculosis* in respiratory specimens in routine clinical practice. *Eur J Clin Microbiol Infect Dis* 2001; 20(10): 724-31
427. Cartuyvels R, De Ridder C, Jonckheere S, Verbist L, Van Eldere J. Prospective clinical evaluation of Amplicor *Mycobacterium tuberculosis* PCR test as a screening method in a low-prevalence population. *J Clin Microbiol* 1996; 34(8): 2001-3
428. Chedore P, Jamieson FB. Routine use of the Gen-Probe MTD2 amplification test for detection of *Mycobacterium tuberculosis* in clinical specimens in a large public health mycobacteriology laboratory. *Diagn Microbiol Infect Dis* 1999; 35(3): 185-91
429. Cleary TJ, Roudel G, Casillas O, Miller N. Rapid and specific detection of *Mycobacterium tuberculosis* by using the Smart Cycler instrument and a specific fluorogenic probe. *J Clin Microbiol* 2003; 41(10): 4783-6
430. Coll P, Garrigo M, Moreno C, Marti N. Routine use of Gen-Probe Amplified *Mycobacterium Tuberculosis* Direct (MTD) test for detection of *Mycobacterium tuberculosis* with smear-positive and smear-negative specimens. *Int J Tuberc Lung Dis*. 2003; 7(9): 886-91
431. Dalovisio JR, Montenegro-James S, Kemmerly SA, Genre CF, Chambers R, Greer D, Pankey GA, Failla DM, Haydel KG, Hutchinson L, Lindley MF, Nunez BM, Praba A, Eisenach KD, Cooper ES. Comparison of the Amplified *M.tuberculosis* (MTB)direct test, Amplicor MTB PCR and IS6110-PCR for detection of MTB in respiratory specimens. *Clin Infect Dis* 1996; 23: 1099-106

432. D'Amato RF, Wallman AA, Hochstein LH, Colaninno PM, Scardamaglia M, Ardila E, Ghouri M, Kim K, Patel RC, Miller A. Rapid diagnosis of pulmonary tuberculosis by using Roche AMPLICOR Mycobacterium tuberculosis PCR test. *J Clin Microbiol* 1995; 33(7): 1832-34
433. De La Calle IJ, De La Calle MAJ, Rodriguez-Iglesias M. Evaluation of the BDProbeTec et system as screening tool in the direct detection of mycobacterium tuberculosis complex in respiratory specimens. *Diagn Microbiol Infect Dis* 2003; 47(4): 573-8
434. Denis O, Devaster JM, Vandenberg O, Vanachter H, Lafontaine T, Lin C, Butzler JP Evaluation of ligase chain reaction for direct detection of Mycobacterium tuberculosis in respiratory specimens. *Zentralbl Bakteriell* 1998; 288(1): 59-65
435. Dilworth JP, Goyal M, Young DB, Shaw RJ. Comparison of polymerase chain reaction for IS6110 and Amplicor in the diagnosis of tuberculosis. *Thorax* 1996; 51(3): 320-22
436. Gallina M, Troupioti P, Rocco G, Sensalari G, Libanori E. Predicting culture results for Mycobacterium tuberculosis complex. Amplified mycobacterium tuberculosis direct test and acid-fast bacilli microscopy. *Chest* 2000; 118(1): 28-32
437. Gamboa F, Fernandez G, Padilla E, Manterola JM, Lonca J, Cardona PJ, Matas L, Ausina V. Comparative evaluation of initial and new versions of the Gen-Probe Amplified Mycobacterium Tuberculosis Direct Test for direct detection of Mycobacterium tuberculosis in respiratory and nonrespiratory specimens. *J Clin Microbiol* 1998; 36(3): 684-89
438. Gamboa F, Manterola JM, Lonca J, Matas L, Cardona PJ, Padilla E, Vinado B, Dominguez J, Hernandez A, Ausina V. Comparative evaluation of two commercial assays for direct detection of Mycobacterium tuberculosis in respiratory specimens. *Eur J Clin Microbiol Infect Dis* 1998; 17(3): 151-57
439. Gurkan O, Acican T, Gulbay B. Evaluation of an amplified Mycobacterium tuberculosis direct test in clinical specimens. *Int J Tuberc Lung Dis* 2002; 6(6): 538-41
440. Ichiyama S, Iinuma Y, Tawada Y, Yamori S, Hasegawa Y, Shimokata K, Nakashima N. Evaluation of Gen-Probe Amplified Mycobacterium Tuberculosis Direct Test and Roche PCR-microwell plate hybridization method (AMPLICOR MYCOBACTERIUM) for direct detection of mycobacteria. *J Clin Microbiol* 1996; 34(1): 130-33
441. Iinuma Y, Senda K, Fujihara N, Saito T, Takakura S, Shimojima M, Kudo T, Ichiyama S. Comparison of the BDProbeTec ET system with the Cobas Amplicor PCR for direct detection of Mycobacterium tuberculosis in respiratory samples. *Eur J Clin Microbiol Infect Dis* 2003; 22(6): 368-71
442. Iwamoto T, Sonobe T, Hayashi K. Loop-mediated isothermal amplification for direct detection of Mycobacterium tuberculosis complex, *M. avium*, and *M. intracellulare* in sputum samples. *J Clin Microbiol* 2003; 41(6): 2616-22
443. Jan IS, Hsueh PR, Teng LJ, Lee LN, Yang PC, Luh KT. Evaluation of an automatic polymerase chain reaction assay for identification of Mycobacterium tuberculosis in respiratory specimens. *J Formos Med Assoc* 1998; 97(3): 204-9
444. Johansen IS, Thomsen VO, Johansen A, Andersen P, Lundgren B. Evaluation of a new commercial assay for diagnosis of pulmonary and nonpulmonary tuberculosis. *Eur J Clin Microbiol Infect Dis* 2002; 21(6): 455-60
445. Jonsson B, Ridell M. The Cobas Amplicor MTB test for detection of Mycobacterium tuberculosis complex from respiratory and non-respiratory clinical specimens. *Scand J Infect Dis* 2003; 35(6-7): 372-7
446. Kearns AM, Freeman R, Steward M, Magee JG. A rapid polymerase chain reaction technique for detecting M tuberculosis in a variety of clinical specimens. *J Clin Pathol* 1998; 51(12): 922-24
447. Kim SY, Park YJ, Kang SJ, Kim BK, Kang CS. Comparison of the BDProbeTec ET system with the roche COBAS AMPLICOR System for detection of Mycobacterium tuberculosis complex in the respiratory and pleural fluid specimens. *Diagn Microbiol Infect Dis* 2004; 49(1): 13-8
448. Lebrun L, Mathieu D, Saulnier C, Nordmann P. Limits of commercial molecular tests for diagnosis of pulmonary tuberculosis. *Eur Respir J* 1997; 10(8): 1874-76
449. Lemaitre N, Armand S, Vachee A, Capilliez O, Dumoulin C, Courcol RJ. Comparison of real-time PCR method and the Gen-Probe Amplified Mycobacterium tuberculosis direct test for detection of Mycobacterium tuberculosis in pulmonary and nonpulmonary specimens. *J Clin Microbiol* 2004; 42(9): 4307-9
450. Levidiotou S, Vrioni G, Galanakis E, Gesouli E, Pappa C, Stefanou D. Four-year experience of use of the Cobas Amplicor system for rapid detection of Mycobacterium tuberculosis complex

- in respiratory and nonrespiratory specimens in Greece. *Eur J Clin Microbiol Infect Dis* 2003; 22(6): 349-56
451. Liu D, Jones SL, Baird R, Pedersen J. Use of Roche Amplicor and multiplex PCR for diagnosis of human mycobacterial infections. *Opportunistic Pathogens* 1997; 9(1): 51-55
  452. Lumb R, Davies K, Dawson D, Gibb R, Gottlieb T, Kershaw C, Kociuba K, Nimmo G, Sangster N, Worthington M, Bastian I. Multicenter evaluation of the Abbott LCx Mycobacterium tuberculosis ligase chain reaction assay. *J Clin Microbiol* 1999; 37(10): 3102-07
  453. Maugein J, Fourche J, Vacher S, Grimond C, Bebear C. Evaluation of the BDProbeTec ET DTB assay(1) for direct detection of Mycobacterium tuberculosis complex from clinical samples. *Diagn Microbiol Infect Dis* 2002; 44(2): 151-5
  454. Mazzarelli G, Rindi L, Piccoli P, Scarparo C, Garzelli C, Tortoli E. Evaluation of the BDProbeTec ET system for direct detection of Mycobacterium tuberculosis in pulmonary and extrapulmonary samples: a multicenter study. *J Clin Microbiol* 2003; 41(4): 1779-82
  455. McHugh TD, Pope CF, Ling CL, Patel S, Billington OJ, Gosling RD, Lipman MC, Gillespie SH. Prospective evaluation of BDProbeTec strand displacement amplification (SDA) system for diagnosis of tuberculosis in non-respiratory and respiratory samples. *J Med Microbiol* 2004; 53: 1215-9
  456. Miller N, Cleary T, Kraus G, Young AK, Spruill G, Hnatyszyn HJ. Rapid and specific detection of Mycobacterium tuberculosis from acid-fast bacillus smear-positive respiratory specimens and BacT/ALERT MP culture bottles by using fluorogenic probes and real-time PCR. *J Clin Microbiol* 2002; 40(11): 4143-7
  457. Moore DF, Curry JI. Detection and identification of Mycobacterium tuberculosis directly from sputum sediments by AMPLICOR PCR. *J Clin Microbiol* 1995; 33: 2686-91
  458. Moore G, Curry JI. Detection and identification of Mycobacterium tuberculosis directly from sputum sediments by ligase chain reaction. *J Clin Microbiol* 1998; 36: 1028-31
  459. O'Sullivan CE, Miller DR, Schneider PS, Roberts GD. Evaluation of Gen-Probe amplified mycobacterium tuberculosis direct test by using respiratory and nonrespiratory specimens in a tertiary care center laboratory. *J Clin Microbiol* 2002; 40(5): 1723-7
  460. Piersimoni C, Callegaro A, Nista D, Bornigia S, De Conti F, Santini G, De Sio G. Comparative evaluation of two commercial amplification assays for direct detection of Mycobacterium tuberculosis complex in respiratory specimens. *J Clin Microbiol* 1997; 35(1): 193-6
  461. Piersimoni C, Callegaro A, Scarparo C, Penati V, Nista D, Bornigia S, Lacchini C, Scagnelli M, Santini G, De Sio G. Comparative evaluation of the new Gen-Probe Mycobacterium tuberculosis Amplified Direct Test and the semiautomated Abbott LCx Mycobacterium tuberculosis assay for direct detection of Mycobacterium tuberculosis complex in respiratory and extrapulmonary specimens. *J Clin Microbiol* 1998; 36: 3601-04
  462. Piersimoni C, Scarparo C, Piccoli P, Rigon A, Ruggiero G, Nista D, Bornigia S. Performance assessment of two commercial amplification assays for direct detection of Mycobacterium tuberculosis complex from respiratory and extrapulmonary specimens. *J Clin Microbiol* 2002; 40(11): 4138-42
  463. Reischl U, Lehn N, Wolf H, Naumann L. Clinical evaluation of the automated COBAS AMPLICOR MTB assay for testing respiratory and nonrespiratory specimens. *J Clin Microbiol* 1998; 36: 2853-60
  464. Rohner P, Jahn EI, Ninet B, Ionati C, Weber R, Auckenthaler R, Pfyffer GE. Rapid diagnosis of pulmonary tuberculosis with the LCx Mycobacterium tuberculosis assay and comparison with conventional diagnostic techniques. *J Clin Microbiol* 1998; 36(10): 3046-47
  465. Rusch-Gerdes S, Richter E. Clinical evaluation of the semiautomated BDProbeTec ET System for the detection of Mycobacterium tuberculosis in respiratory and nonrespiratory specimens. *Diagn Microbiol Infect Dis* 2004; 48(4):265-70
  466. Scarparo C, Piccoli P, Rigon A, Ruggiero G, Scagnelli M, Piersimoni C. Comparison of enhanced Mycobacterium tuberculosis amplified direct test with Cobas Amplicor Mycobacterium tuberculosis assay for direct detection of Mycobacterium tuberculosis complex in respiratory and extrapulmonary specimens. *J Clin Microbiol* 2000; 38: 1559-62
  467. Smith MB, Bergmann JS, Harris SL, Woods GL. Evaluation of Roche Amplicor MTB assay for the detection of mycobacterium tuberculosis in sputum specimens from prison inmates. *Diagn Microbiol Infect Dis* 1997; 27: 113-16

468. Smith MB, Bergmann JS, Onoroto M, Mathews G, Woods GL. Evaluation of the enhanced amplified Mycobacterium tuberculosis direct test for direct detection of Mycobacterium tuberculosis complex in respiratory specimens. *Arch Pathol Lab Med* 1999; 123(11): 1101-3
469. Soini H, Agha SA, El-Fiky A, Viljanen MK. Comparison of amplicor and 32-kilodalton PCR for detection of Mycobacterium tuberculosis from sputum specimens. *J Clin Microbiol* 1996; 34(7): 1829-30
470. Tevere VJ, Hewitt PL, Dare A, Hocknell P, Keen A, Spadaro JP, Young KK. Detection of Mycobacterium tuberculosis by PCR amplification with pan-Mycobacterium primers and hybridization to an M. tuberculosis-specific probe. *J Clin Microbiol* 1996; 34(4): 918-23
471. Viinainen AH, Soini H, Marjamaki M, Liippo K, Viljanen MK. Ligase chain reaction assay is clinically useful in the discrimination of smear-positive pulmonary tuberculosis from atypical mycobacterioses. *Ann Med* 2000; 32(4): 279-83
472. Viveiros M, Pinheiro S, Moreira P, Pacheco T, Brum L. Evaluation of a commercial ligase chain reaction assay for the diagnosis of pulmonary and extra-pulmonary tuberculosis. *Int J Tuberc Lung Dis* 1999; 3(6): 508-14
473. Vuorinen P, Miettinen A, Vuento R, Hallstrom O. Direct detection of Mycobacterium tuberculosis complex in respiratory specimens by Gen-Probe Amplified Mycobacterium Tuberculosis Direct Test and Roche Amplicor Mycobacterium Tuberculosis Test. *J Clin Microbiol* 1995; 33(7): 1856-59
474. Wang JY, Lee LN, Chou CS, Huang CY, Wang SK, Lai HC, Hsueh PR, Luh KT. Performance assessment of a nested-PCR assay (the rapid BAP-MTB) and the BDProbeTec ET system for detection of Mycobacterium tuberculosis in clinical specimens. *J Clin Microbiol* 2004; 43 (10): 4599-603
475. Wang SX, Tay L. Evaluation of three nucleic acid amplification methods for direct detection of Mycobacterium tuberculosis complex in respiratory specimens. *J Clin Microbiol* 1999; 37(6): 1932-34
476. Yam WC, Yuen KY, Seto WH. Direct detection of Mycobacterium tuberculosis in respiratory specimens using an automated DNA amplification assay and a single tube nested polymerase chain reaction (PCR). *Clin Chem Lab Med* 1998; 36(8): 597-9
477. Yee YC, Gough A, Kumarasinghe G, Lim TK. The pattern of utilisation and accuracy of a commercial nucleic acid amplification test for the rapid diagnosis of Mycobacterium tuberculosis in routine clinical practice. *Singapore Med J* 2002; 43(8): 415-20
478. Yuen KY, Yam WC, Wong LP, Seto WH. Comparison of two automated DNA amplification systems with a manual one-tube nested PCR assay for diagnosis of pulmonary tuberculosis. *J Clin Microbiol* 1997; 35(6): 1385-89
479. Zolnir-Dovc M, Poljak M, Seme K, Rus A, Avsic-Zupanc T. Evaluation of two commercial amplification assays for detection of Mycobacterium tuberculosis complex in respiratory specimens. *Infection* 1995; 23(4): 216-21
480. Dickersin K. The existence of publication bias and risk factors for its occurrence. *JAMA* 1990; 263: 1385-9
481. Begg CB, Mazumdar M. Operating characteristics of a rank correlation test publication bias. *Biometrics* 1994; 50: 1088-101
482. Egger M, Davey Smith G, Schneider M, Minder C. Bias in meta-analysis detected by a simple, graphical test. *BMJ* 1997; 315: 629-34
